# Supplementary material
Source: PubMed Central journal article supplement (PMC6143097)
Supplement: jamapsychiatry-75-809-s001.pdf [file jamapsychiatry-75-809-s001.pdf]

## Supplementary Online Content

Maher GM, O’Keeffe GW, Kearney PM, et al. Association of hypertensive disorders of pregnancy with risk of neurodevelopmental disorders in offspring: a systematic review and meta-analysis. *JAMA Psychiatry*. Published online June 6, 2018. doi:10.1001/jamapsychiatry.2018.0854

**eTable 1.** Search Strategy for Each Electronic Database

**eTable 2.** Summary of Characteristics of ASD Studies Included

**eTable 3.** Summary of Characteristics of ADHD Studies Included

**eTable 4.** Summary of HDP and Other Neurodevelopmental Disorders

**eTable 5.** Level of Bias in ASD Studies

**eTable 6.** Level of Bias in ADHD Studies

**eTable 7.** Level of Bias in Other Neurodevelopmental Outcome Studies

**eFigure 1.** ASD Studies With Crude and Adjusted Estimates

**eFigure 2.** ADHD Studies With Crude and Adjusted Estimates

**eFigure 3.** ASD Studies That Adjust for Maternal Age and Smoking and Parity/Birth Order

**eFigure 4.** ADHD Studies That Adjust for Maternal Age and Educational Level

**eFigure 5.** Funnel Plot of Published HDP and ASD Studies

**eReferences.**

This supplementary material has been provided by the authors to give readers additional information about their work.

| <b>eTable 1. Search Strategy for Each Electronic Database</b>       |                                                                                                                                                                                                                                                                                 |
|---------------------------------------------------------------------|---------------------------------------------------------------------------------------------------------------------------------------------------------------------------------------------------------------------------------------------------------------------------------|
| <b>Search terms: For PubMed (1946 - June 7, 2017) LIMIT: humans</b> |                                                                                                                                                                                                                                                                                 |
| 1.                                                                  | pre eclampsia                                                                                                                                                                                                                                                                   |
| 2.                                                                  | preeclampsia                                                                                                                                                                                                                                                                    |
| 3.                                                                  | pre-eclampsia                                                                                                                                                                                                                                                                   |
| 4.                                                                  | gestational hypertension                                                                                                                                                                                                                                                        |
| 5.                                                                  | hypertensive pregnancy disorder                                                                                                                                                                                                                                                 |
| 6.                                                                  | hypertensive disorders of pregnancy                                                                                                                                                                                                                                             |
| 7.                                                                  | pregnancy induced hypertension                                                                                                                                                                                                                                                  |
| 8.                                                                  | pregnancy-induced hypertension                                                                                                                                                                                                                                                  |
| 9.                                                                  | pregnancy hypertension                                                                                                                                                                                                                                                          |
| 10.                                                                 | toxaemia                                                                                                                                                                                                                                                                        |
| 11.                                                                 | toxemia                                                                                                                                                                                                                                                                         |
| 12.                                                                 | maternal metabolic                                                                                                                                                                                                                                                              |
| 13.                                                                 | [#1 or #2 or #3 or #4 or #5 or #6 or #7 or #8 or #9 or #10 or #11 or #12]                                                                                                                                                                                                       |
| 14.                                                                 | autism                                                                                                                                                                                                                                                                          |
| 15.                                                                 | autism spectrum                                                                                                                                                                                                                                                                 |
| 16.                                                                 | autistic                                                                                                                                                                                                                                                                        |
| 17.                                                                 | autism spectrum disorders                                                                                                                                                                                                                                                       |
| 18.                                                                 | autism Spectrum Disorder                                                                                                                                                                                                                                                        |
| 19.                                                                 | autistic spectrum disorders                                                                                                                                                                                                                                                     |
| 20.                                                                 | autistic Spectrum Disorder                                                                                                                                                                                                                                                      |
| 21.                                                                 | Asperger                                                                                                                                                                                                                                                                        |
| 22.                                                                 | Asperger's                                                                                                                                                                                                                                                                      |
| 23.                                                                 | Asperger's Syndrome                                                                                                                                                                                                                                                             |
| 24.                                                                 | autistic Spectrum                                                                                                                                                                                                                                                               |
| 25.                                                                 | pervasive developmental disorder                                                                                                                                                                                                                                                |
| 26.                                                                 | pervasive developmental disorders                                                                                                                                                                                                                                               |
| 27.                                                                 | disintegrative disorder                                                                                                                                                                                                                                                         |
| 28.                                                                 | rett syndrome                                                                                                                                                                                                                                                                   |
| 29.                                                                 | attention deficit disorder                                                                                                                                                                                                                                                      |
| 30.                                                                 | ADD                                                                                                                                                                                                                                                                             |
| 31.                                                                 | ADHD                                                                                                                                                                                                                                                                            |
| 32.                                                                 | attention-deficit                                                                                                                                                                                                                                                               |
| 33.                                                                 | attention-deficit/hyperactivity disorder                                                                                                                                                                                                                                        |
| 34.                                                                 | attention-deficit hyperactivity disorder                                                                                                                                                                                                                                        |
| 35.                                                                 | attention-deficit-hyperactivity disorder                                                                                                                                                                                                                                        |
| 36.                                                                 | hyperactivity disorder                                                                                                                                                                                                                                                          |
| 37.                                                                 | hyperactiv*                                                                                                                                                                                                                                                                     |
| 38.                                                                 | overactive*                                                                                                                                                                                                                                                                     |
| 39.                                                                 | inattent*                                                                                                                                                                                                                                                                       |
| 40.                                                                 | hyperkinetic disorders                                                                                                                                                                                                                                                          |
| 41.                                                                 | hyperkinet*                                                                                                                                                                                                                                                                     |
| 42.                                                                 | neurodevelopment                                                                                                                                                                                                                                                                |
| 43.                                                                 | specific learning disorder                                                                                                                                                                                                                                                      |
| 44.                                                                 | learning disorder                                                                                                                                                                                                                                                               |
| 45.                                                                 | intellectual disability                                                                                                                                                                                                                                                         |
| 46.                                                                 | mental retardation                                                                                                                                                                                                                                                              |
| 47.                                                                 | communication disorder                                                                                                                                                                                                                                                          |
| 48.                                                                 | motor disorder                                                                                                                                                                                                                                                                  |
| 49.                                                                 | conduct disorder                                                                                                                                                                                                                                                                |
| 50.                                                                 | IQ                                                                                                                                                                                                                                                                              |
| 51.                                                                 | reading age                                                                                                                                                                                                                                                                     |
| 52.                                                                 | school performance                                                                                                                                                                                                                                                              |
| 53.                                                                 | [#14 or #15 or #16 or #17 or #18 or #19 or #20 or #21 or #22 or #23 or #24 or #25 or #26 or #27 or #28 or #29 or #30 or #31 or #32 or #33 or #34 or #35 or #36 or #37 or #38 or #39 or #40 or #41 or #42 or #43 or #44 or #45 or #46 or #47 or #48 or #49 or #50 or #51 or #52] |
| 54.                                                                 | [#13 and #53]                                                                                                                                                                                                                                                                   |

| <b>eTable 2. Summary of Characteristics of ASD Studies Included</b> |                                    |                     |                             |                                               |                                                                                                     |                |                                                                                                          |                                                                                                                                             |                                                                     |                                |
|---------------------------------------------------------------------|------------------------------------|---------------------|-----------------------------|-----------------------------------------------|-----------------------------------------------------------------------------------------------------|----------------|----------------------------------------------------------------------------------------------------------|---------------------------------------------------------------------------------------------------------------------------------------------|---------------------------------------------------------------------|--------------------------------|
| <b>Study</b>                                                        | <b>Data source</b>                 | <b>Study design</b> | <b>Region, study period</b> | <b>Sample size and prevalence of exposure</b> | <b>Diagnosis of HDP</b>                                                                             | <b>Outcome</b> | <b>Assessment method</b>                                                                                 | <b>Confounders adjusted</b>                                                                                                                 | <b>Matching factors</b>                                             | <b>Confounders identified?</b> |
| Curran et al, <sup>1</sup> 2017                                     | Millennium Cohort study            | Cohort              | UK 2000-01                  | HDP 983, No HDP 12115 HDP= 7.5%               | Doctor-diagnosed self-reported HDP                                                                  | ASD            | Maternal-reported                                                                                        | Smoking during pregnancy, birth order, poverty, maternal ethnicity, age, education, depression, BMI, longstanding diabetes, longstanding HT | n/a                                                                 | Literature                     |
| Walker et al, <sup>2</sup> 2015                                     | CHARGE study                       | Case-control        | California 2003-11          | ASD 517, Controls 350                         | PE from medical records or maternal self-reporting in telephone interview. (Diagnostic criteria NR) | ASD            | Previous ASD diagnoses were examined using the ADOS and the primary caregiver was administered the ADI-R | Maternal educational level, parity, pre-pregnancy obesity                                                                                   | Age, sex, broad geographic regions within the study catchment areas | Literature and DAG             |
| Polo-Kantola et al, <sup>3</sup> 2014                               | National registry data             | Case-control        | Finland 1990-2005           | ASD 1036, Controls 4132                       | Maternal HT: PE and/or PIH from MBR: BP >140/90                                                     | ASD            | ICD-10                                                                                                   | Maternal age, smoking during pregnancy, number of previous births, maternal psychiatric history                                             | Sex, date of birth, place of birth                                  | Literature                     |
| Langridge et al, <sup>4</sup> 2013                                  | MNS, Registrar General's birth and | Cohort              | Western Australia 1984-99   | ASD without ID 452, no ASD                    | Pregnancy hypertension (PE and                                                                      | ASD            | DSM-III-R, DSM-IV, DSM-IV-TR                                                                             | Birth year, maternal and pregnancy conditions (maternal diabetes, threatened                                                                | n/a                                                                 | NR                             |

|                                        |                                            |              |                |                                 |                                                                                    |                              |           |                                                                                                                                                                                                                                                                                                                                                                                                                                                                                                                        |                                              |                                                                                          |
|----------------------------------------|--------------------------------------------|--------------|----------------|---------------------------------|------------------------------------------------------------------------------------|------------------------------|-----------|------------------------------------------------------------------------------------------------------------------------------------------------------------------------------------------------------------------------------------------------------------------------------------------------------------------------------------------------------------------------------------------------------------------------------------------------------------------------------------------------------------------------|----------------------------------------------|------------------------------------------------------------------------------------------|
|                                        | death registrations                        |              |                | 376529<br>Prevalence of HDP: NR | essential hypertension) from MNS. (Diagnostic criteria NR)                         |                              |           | abortion, asthma, UTI during pregnancy, placenta praevia, placenta abruption, other antepartum haemorrhage), socio-demographics (parity, maternal and paternal age group, maternal ethnicity, community-level socioeconomic status and community accessibility/remoteness), labour and delivery factors (preterm type, mode of delivery, breech, any complication of labour or delivery), neonatal outcomes (infant gender, resuscitation required at birth, percentage of optimal birthweight and head circumference) |                                              |                                                                                          |
| Mrozek-Budzyn et al, <sup>5</sup> 2013 | Psychiatric outpatient clinic for children | Case-control | Poland 2006-07 | Cases 96, Controls 192          | PE and chronic HT from medical records or self-reporting. (Diagnostic criteria NR) | Childhood or atypical autism | ICD-10    | No                                                                                                                                                                                                                                                                                                                                                                                                                                                                                                                     | Year of birth, sex and general practitioners | Only factors associated with ASD in univariate model were included in multivariate model |
| Nath et al, <sup>6</sup> 2012          | Neurodevelopment and Early Intervention    | Case-control | India 2012     | Cases 31, Controls 100          | PIH: Self-reported                                                                 | ASD                          | DSM IV TR | No                                                                                                                                                                                                                                                                                                                                                                                                                                                                                                                     | Age                                          | NR                                                                                       |

|                                    |                                 |              |                               |                                                                              |                                                                                                                                  |     |                    |                                                                                                     |                                                 |                                                                                          |
|------------------------------------|---------------------------------|--------------|-------------------------------|------------------------------------------------------------------------------|----------------------------------------------------------------------------------------------------------------------------------|-----|--------------------|-----------------------------------------------------------------------------------------------------|-------------------------------------------------|------------------------------------------------------------------------------------------|
|                                    | Clinic                          |              |                               |                                                                              |                                                                                                                                  |     |                    |                                                                                                     |                                                 |                                                                                          |
| Lyall et al, <sup>7</sup> 2012     | Nurses' Health Study II         | Cohort       | United States 1989-2005       | Total 66445, Toxemia 5968, Pregnancy-related HBP 5884 Toxemia = 9% HBP= 8.9% | Toxemia and pregnancy related HBP self-reported in questionnaire                                                                 | ASD | Maternal-reporting | Race, marital status, income, spouse education, nurse's age at baseline, age at first birth, parity | n/a                                             | Literature                                                                               |
| Krakowiak et al, <sup>8</sup> 2012 | CHARGE study                    | Case-control | California, 2003-10           | Cases 517, Controls 315                                                      | Hypertension (chronic, gestational or PE) from medical records or structured interview with the mother. (Diagnostic criteria NR) | ASD | ADI-R and ADOS     | Mother's age at delivery, race/ethnicity, education level, delivery payer, calendar time            | Age, gender, and regional centre catchment area | DAG                                                                                      |
| Dodds et al, <sup>9</sup> 2011     | Administrative Health Databases | Cohort       | Nova Scotia, Canada 1990-2002 | PIH 11836, No PIH 117897 PIH= 9.1%                                           | PIH from Perinatal Database: ICD-9 and ICD-10                                                                                    | ASD | ICD-9 and ICD-10   | No                                                                                                  | n/a                                             | Only factors associated with ASD in univariate model were included in multivariate model |
| Burstyn et al, <sup>10</sup> 2010  | Provincial delivery records and | Cohort       | Alberta, Canada 1998-         | PE 2774, No PE                                                               | PE from APHP delivery                                                                                                            | ASD | ICD-9              | Maternal age, maternal weight, maternal height, pre-                                                | n/a                                             | NR                                                                                       |

|                                     |                                                |              |                          |                               |                                                                          |                    |                                                                                                            |                                                                                                                                                                                                                                                      |                                             |            |
|-------------------------------------|------------------------------------------------|--------------|--------------------------|-------------------------------|--------------------------------------------------------------------------|--------------------|------------------------------------------------------------------------------------------------------------|------------------------------------------------------------------------------------------------------------------------------------------------------------------------------------------------------------------------------------------------------|---------------------------------------------|------------|
|                                     | physician billing data                         |              | 2004                     | 213568 PE= 1.3%               | records. (Diagnostic criteria NR)                                        |                    |                                                                                                            | pregnancy diabetes, gestational diabetes, bleeding, smoking, poor weight gain, parity, mother's SES, presentation (breech etc.), type of labour, caesarean section, gestational age, birthweight, APGAR at 1 min and 5 mins, infant sex, birth year. |                                             |            |
| Mann et al, <sup>11</sup> 2010      | Birth certificate and Medicaid billing records | Cohort       | South Carolina 1996-2002 | PE 5531, No PE 82146 PE= 6.3% | PE/ eclampsia from billing records for Medicaid-eligible women, ICD-9    | ASD                | ICD-9 from Medicaid billing records or children receiving services from the South Carolina DDSN for autism | Maternal age, race, alcohol use, educational attainment, year of birth, child's sex, and diagnosis with a high risk condition (alcohol use, tobacco use, down syndrome, fragile X syndrome, brain anomaly) and birthweight                           | n/a                                         | NR         |
| Bilder et al, <sup>12</sup> 2009    | Birth certificate records and ADDM             | Case-control | Utah, US 1994-2002       | Cases 132, Controls 13200     | Chronic and PIH from birth certificate records. (Diagnostic criteria NR) | ASD                | DSM-IV-TR from ADDM                                                                                        | No                                                                                                                                                                                                                                                   | Gender and birth year                       | NR         |
| Buchmayer et al, <sup>13</sup> 2009 | Swedish MBR and Hospital Discharge Register    | Case-control | Sweden 1987-2002         | Cases 1216, Controls 6080     | PE and gestational HT from the MBR: ICD-9 and ICD-10                     | Autistic disorders | ICD-9 and ICD-10                                                                                           | Parity, previous miscarriage, childless years, any maternal infection during pregnancy, season of delivery, diabetes mellitus, maternal age, smoking, maternal                                                                                       | Age, gender, birth year, and birth hospital | Literature |

|                                     |                                        |              |                           |                            |                                                  |                   |                                                                                                             |                                                                                                                                                                                                                                                  |                                  |                                                                                        |
|-------------------------------------|----------------------------------------|--------------|---------------------------|----------------------------|--------------------------------------------------|-------------------|-------------------------------------------------------------------------------------------------------------|--------------------------------------------------------------------------------------------------------------------------------------------------------------------------------------------------------------------------------------------------|----------------------------------|----------------------------------------------------------------------------------------|
|                                     |                                        |              |                           |                            |                                                  |                   |                                                                                                             | country of birth, whether the mother lived with the father, maternal schizophrenia                                                                                                                                                               |                                  |                                                                                        |
| Larsson et al, <sup>14</sup> 2005   | Danish PCR, Danish MBR and IDA         | Case-control | Denmark 1978-90           | Cases 698, Controls 17450  | PE from MBR. (Diagnostic criteria NR)            | Autism            | ICD-8 and ICD-10 from PCR                                                                                   | No (information on PE available from 1978-90 only)                                                                                                                                                                                               | Gender, birth year and age       | NR                                                                                     |
| Glasson et al, <sup>15</sup> 2004   | MCHRDB                                 | Case-control | Western Australia 1980-95 | Cases 314, Controls 1313   | PE: ICD-9                                        | Autism            | DSM                                                                                                         | No                                                                                                                                                                                                                                               | Sex                              | NR                                                                                     |
| Hultman et al, <sup>16</sup> 2002   | Swedish MBR and In-patient Register    | Case-control | Sweden 1974-93            | Cases 408, Controls 2040   | HDP from Medical Birth Register: ICD-8 and ICD-9 | Infantile autism  | ICD-9 - Discharged from a Swedish psychiatric or general hospital with a main diagnosis of infantile autism | Maternal age, parity, smoking during pregnancy, mother's country of birth, diabetes, pregnancy bleeding, mode of delivery, season of birth, gestational age, birthweight for gestational age, Apgar score at 5 minutes, congenital malformations | Sex, year, and hospital of birth | NR                                                                                     |
| Eaton et al, <sup>17</sup> 2001     | Danish MBR and Danish PCR              | Case-control | Denmark 1973-93           | Cases 116, Controls 102905 | Eclampsia from MBR. (Diagnostic criteria NR)     | Autism            | ICD from PCR                                                                                                | Gender and year of birth                                                                                                                                                                                                                         | NR                               | Only variables significantly associated with outcome included in multivariate analysis |
| Matsuishi et al, <sup>18</sup> 1999 | NICU survivors of St. Mary's Hospital, | Case-control | Kurume, Japan 1983-87     | Cases 18, Controls 214     | Toxemia. (Diagnostic criteria NR)                | Autistic disorder | DSM-III-R                                                                                                   | No                                                                                                                                                                                                                                               | NR                               | NR                                                                                     |

|                                          |                                                          |              |                           |                         |                                                                           |        |                                                                                                       |             |         |                                  |
|------------------------------------------|----------------------------------------------------------|--------------|---------------------------|-------------------------|---------------------------------------------------------------------------|--------|-------------------------------------------------------------------------------------------------------|-------------|---------|----------------------------------|
|                                          | Kurume                                                   |              |                           |                         |                                                                           |        |                                                                                                       |             |         |                                  |
| Mason-Brothers et al, <sup>19</sup> 1990 | Survey data and medical records                          | Case-control | Utah, US 1965-84          | Cases 225, Controls 60  | Toxemia from medical records. (Diagnostic criteria NR)                    | Autism | DSM-III from survey                                                                                   | No          | Sibling | NR                               |
| Deykin et al, <sup>20</sup> 1980         | Referral agencies and medical records and interview data | Case-control | Massachusetts, US 1975-77 | Cases 118, Controls 246 | Toxemia from medical records and interview data. (Diagnostic criteria NR) | Autism | ≥1 symptoms of impaired relatedness to the environment, stereopathy and impaired language development | Birth order | Sibling | Excess of first born among cases |

ASD=autism spectrum disorder. HDP=hypertensive disorder of pregnancy. n/a=not applicable. CHARGE=Childhood Autism Risks from Genetics and the Environment. PE=pre-eclampsia. NR=not reported. ADOS=Autism Diagnostic Observation Schedule. ADI-R=Autism Diagnostic Interview, Revised. DAG=directed acyclic graph. HT=hypertension. PIH=pregnancy-induced hypertension. MBR=Medical Birth Register. ICD=International Classification of Disease. MNS=Midwives' Notification System. ID=intellectual disability. DSM=Diagnostic and Statistical Manual of Mental Disorders. UTI=urinary tract infection. HBP=high blood pressure. APHP=Alberta Perinatal Health Program. SES=socioeconomic status. DDSN=Department of Disabilities and Special Needs. ADDM=Autism Developmental Disabilities Monitoring Network. PCR=Psychiatric Central Register. IDA=Integrated Database for Longitudinal Labour Market Research. MCHRDB=Maternal and Child Health Research Database. NICU=neonatal intensive care unit.



| <b>eTable 3: Summary of Characteristics of ADHD Studies Included</b> |                         |              |                             |                                        |                                              |         |                                                                                                        |                                                                                                                                                                                                                                                                               |                                                  |                                      |
|----------------------------------------------------------------------|-------------------------|--------------|-----------------------------|----------------------------------------|----------------------------------------------|---------|--------------------------------------------------------------------------------------------------------|-------------------------------------------------------------------------------------------------------------------------------------------------------------------------------------------------------------------------------------------------------------------------------|--------------------------------------------------|--------------------------------------|
| Study                                                                | Data source             | Study design | Region, study period        | Sample size and prevalence of exposure | Diagnosis of HDP                             | Outcome | Assessment method                                                                                      | Confounders adjusted                                                                                                                                                                                                                                                          | Matching factors                                 | Confounders identified?              |
| Böhm et al, <sup>21</sup> 2017                                       | Millennium Cohort study | Cohort       | United Kingdom 2001-08      | HDP 1069, No HDP 12432 HDP= 7.9%       | Self-reported HDP                            | ADHD    | Maternal-reported                                                                                      | Alcohol during pregnancy, maternal education, maternal depression, maternal age, poverty status                                                                                                                                                                               | n/a                                              | Literature                           |
| Silva et al, <sup>22</sup> 2014                                      | MNS and MODDS system    | Case-control | Western Australia 1981-2003 | Cases 12991, Controls 30071            | PE from MNS system. (Diagnostic criteria NR) | ADHD    | DSM-IV or ICD-10 Data extracted from MODDS on children and young adults dispensed stimulant medication | Marital status, parity, smoking, complications of pregnancy, onset of labor, augmentation of labor, complications of labor, type of delivery, child characteristics (gestational age, birthweight, average/small/large for gestational age) maternal age, Apgar at five mins. | Year of birth, gender, and socio-economic status | Available from MNS for data analysis |
| Cak and Gokler, <sup>23</sup> 2013                                   | NICU hospital records   | Cohort       | Turkey 2003-08              | Total 106, PE 16, HT 22                | HT and PE: Self-reported and NICU            | ADHD    | K-SADS-PL according to DSM-IV                                                                          | No                                                                                                                                                                                                                                                                            | n/a                                              | NR                                   |

|                                             |                                                                                                       |                  |                                         |                                      |                                                                                                    |      |                                                                                                                                                                                            |                                                                                                                                                                                                       |                     |                              |
|---------------------------------------------|-------------------------------------------------------------------------------------------------------|------------------|-----------------------------------------|--------------------------------------|----------------------------------------------------------------------------------------------------|------|--------------------------------------------------------------------------------------------------------------------------------------------------------------------------------------------|-------------------------------------------------------------------------------------------------------------------------------------------------------------------------------------------------------|---------------------|------------------------------|
|                                             |                                                                                                       |                  |                                         | HT=<br>20.8%<br>PE=<br>15.1%         | records.<br>(Diagnostic<br>criteria NR)                                                            |      |                                                                                                                                                                                            |                                                                                                                                                                                                       |                     |                              |
| Getahun<br>et al, <sup>24</sup><br>2013     | KPSC<br>medical<br>records                                                                            | Case-<br>control | Southern<br>California<br>1995-<br>2010 | Cases<br>13613,<br>Controls<br>68065 | PE:ICD-9-<br>CM                                                                                    | ADHD | Clinical<br>diagnosis of<br>ADHD using<br>ICD-9-CM on<br>at least 2<br>separate<br>visits or a<br>diagnosis on<br>1 visit and at<br>least 2 refills<br>of ADHD-<br>specific<br>medications | Maternal age,<br>education,<br>smoking during<br>pregnancy,<br>parity, prenatal<br>care, household<br>income,<br>psychosocial<br>disorder during<br>pregnancy, child<br>race/ethnicity,<br>and gender | Age at<br>diagnosis | "Chosen a<br><i>priori</i> " |
| Golmirzae<br>i et al, <sup>25</sup><br>2013 | Cluster<br>sampling<br>of<br>preschool<br>children                                                    | Case-<br>control | Southern<br>Iran<br>2012                | Cases<br>208,<br>Controls<br>196     | PE self-<br>reported in<br>quest-<br>ionnaire                                                      | ADHD | Conners'<br>parents and<br>teachers<br>rating scale<br>and interview<br>by a child<br>and<br>adolescent<br>psychiatrist<br>using DSM-<br>IV criteria                                       | No                                                                                                                                                                                                    | Age                 | NR                           |
| Amiri et<br>al, <sup>26</sup> 2012          | Child and<br>Adol-<br>escent<br>Psych-<br>iatric<br>Clinics.<br>Controls<br>from<br>primary<br>school | Case-<br>control | Tabriz,<br>Iran 2009                    | Cases<br>164,<br>Controls<br>166     | PE self-<br>reported and<br>medical<br>records<br>when<br>possible.<br>(Diagnostic<br>criteria NR) | ADHD | The ADHD<br>Rating Scale-<br>Parent<br>Version<br>questionnaire<br>according to<br>DSM-IV-TR<br>criteria and<br>K-SADS<br>according to                                                     | No                                                                                                                                                                                                    | Age                 | NR                           |

|                                           |                                                                         |              |                  |                                                             |                                                                                         |      |                                                                                                                                                             |                                                                                                         |                              |                                                             |
|-------------------------------------------|-------------------------------------------------------------------------|--------------|------------------|-------------------------------------------------------------|-----------------------------------------------------------------------------------------|------|-------------------------------------------------------------------------------------------------------------------------------------------------------------|---------------------------------------------------------------------------------------------------------|------------------------------|-------------------------------------------------------------|
|                                           | students                                                                |              |                  |                                                             |                                                                                         |      | DSM-III-R and DSM-IV                                                                                                                                        |                                                                                                         |                              |                                                             |
| Halmoy et al, <sup>27</sup> 2012          | MBR of Norway                                                           | Cohort       | Norway 1967-87   | Total 1172396, Chronic HT 1570, PE 28495 HT= 0.13% PE= 2.4% | Chronic hypertension and PE from the MBR. (Diagnostic criteria NR)                      | ADHD | Adult ADHD patients who were approved for stimulant treatment in Norway during 1997–2005, according to ICD-10 criteria, modified to be comparable to DSM-IV | Year of birth, parity, age of mother at birth, educational level of mother and marital status of mother | Born in the same time period | NR                                                          |
| Ketzer et al, <sup>28</sup> 2012          | 12 public schools in Porto Alegre, Brazil and ADHD outpatient programme | Case-control | Brazil 2001-07   | Cases 124, Controls 124                                     | PE/ eclampsia self-reported and medical records when possible. (Diagnostic criteria NR) | ADHD | K-SADS-E and DSM-IV criteria                                                                                                                                | Agoraphobia (anxiety disorder), maternal ADHD and cigarettes/day during pregnancy                       | Age, gender                  | Literature                                                  |
| Gustafsson and Källén, <sup>29</sup> 2011 | Swedish MBR and Department of Child and Adolescent Psychiatry Register  | Cohort       | Sweden 1986-2006 | PE 888, No PE 31124 PE= 2.8%                                | PE from MBR. (Diagnostic criteria NR)                                                   | ADHD | DSM-III-R11 before 1994 and DSM-IV12 from 1994 onwards                                                                                                      | No                                                                                                      | n/a                          | Only variables with p<0.2 included in multivariate analysis |
| Mann and McDermo                          | Medicaid billing                                                        | Cohort       | South Carolina   | PE 4674, No PE                                              | PE/ eclampsia:                                                                          | ADHD | Diagnosed with ADHD                                                                                                                                         | GU infection, infant race,                                                                              | n/a                          | Literature                                                  |

|                        |         |  |           |                      |       |  |                                                          |                                                                                                                               |  |  |
|------------------------|---------|--|-----------|----------------------|-------|--|----------------------------------------------------------|-------------------------------------------------------------------------------------------------------------------------------|--|--|
| tt, <sup>30</sup> 2011 | records |  | 1996-2002 | 80047<br>PE=<br>5.5% | ICD-9 |  | using ICD-9<br>by at least<br>two different<br>providers | maternal age<br>and education,<br>alcohol and<br>tobacco use,<br>infant sex,<br>birthweight, and<br>oldest age in<br>Medicaid |  |  |
|------------------------|---------|--|-----------|----------------------|-------|--|----------------------------------------------------------|-------------------------------------------------------------------------------------------------------------------------------|--|--|

ADHD=attention deficit/hyperactivity disorder. HDP=hypertensive disorder of pregnancy. n/a=not applicable. MNS=Midwives' Notification System. MODDS=Monitoring of Drugs of Dependence System. PE=pre-eclampsia. DSM=Diagnostic and Statistical Manual of Mental Disorders. ICD=International Classification of Disease. ICD-9-CM=International Classification of Diseases, Ninth Revision, Clinical Modification. NICU=neonatal intensive care unit. HT=hypertension. K-SADS-PL=Schedule for Affective Disorders and Schizophrenia for School Age Children-Present and Lifetime Version. NR=not reported. KPSC=Kaiser Permanente Southern California. K-SADS-E=Schedule for Affective Disorders and Schizophrenia for School Age Children-Epidemiological Version. MBR=Medical Birth Registry.

**eTable 4. Summary of HDP and Other Neurodevelopmental Disorders**  
**Summary of HDP and cognitive functioning/developmental delay studies**

| <b>Pre-eclampsia</b>                 |                              |                     |                                            |                                                  |                                                                                        |                                    |                                                                                                         |                                                                                                                                                                                       |
|--------------------------------------|------------------------------|---------------------|--------------------------------------------|--------------------------------------------------|----------------------------------------------------------------------------------------|------------------------------------|---------------------------------------------------------------------------------------------------------|---------------------------------------------------------------------------------------------------------------------------------------------------------------------------------------|
| <b>Study</b>                         | <b>Population</b>            | <b>Study design</b> | <b>Region, study period</b>                | <b>Sample size</b>                               | <b>Diagnosis of HDP</b>                                                                | <b>Outcome measure</b>             | <b>Assessment method</b>                                                                                | <b>Main findings</b>                                                                                                                                                                  |
| Warshafsky et al, <sup>31</sup> 2016 | Offspring, age 1-5 years     | Cohort              | Kingston and Ottawa, Canada 2003-09        | PE 95, No PE 140                                 | Severe PE: BP >140/90 mm Hg and proteinuria >300 mg/24 hours or ≥1+ on repeat dipstick | Neurodevelopmental performance     | Failure of Ages and Stages Questionnaire                                                                | Severe PE v NT: No significant associations OR and 95% CI:<br>Year 1 follow-up: 0.90 (0.24 to 3.34)<br>Year 2 follow-up: 0.63 (0.19 to 2.09)<br>Year 3 follow-up: 2.31 (0.63 to 8.53) |
| Walker et al, <sup>2</sup> 2015      | Offspring, aged 24-60 months | Case-control        | 20 Californian counties, 2003-11           | Developmental delay 138, typical development 277 | PE: medical records                                                                    | Development delay                  | Vineland Adaptive Behaviour Scales, Mullen Scales of Early Learning, Social Communication Questionnaire | PE (medical records only) v NT:<br>No significant association OR and 95% CI:<br>1.82 (0.72, 4.64)                                                                                     |
| Heikura et al, <sup>32</sup> 2013    | Offspring, age 11.5 years    | Cohort              | Oulu and Lapland, Northern Finland 1985-86 | PE 267, NT 6897                                  | PE: BP ≥140/90mm Hg and proteinuria                                                    | Mild cognitive limitations         | IQ between 50 and 85 based on standardised psychometric tests (eg. WISC-R)                              | PE v NT:<br>No significant association OR and 95% CI:<br>1.2 (0.5, 2.8)                                                                                                               |
| Tuovinen et al, <sup>33</sup> 2013   | Offspring, 70 years later    | Cohort              | Helsinki, Finland 1934-44                  | PE 31, NT 553                                    | PE: proteinuria and SBP ≥140mm Hg or DBP ≥90mm                                         | Self-reported cognitive impairment | CFQ and DEX                                                                                             | PE associated with significantly more                                                                                                                                                 |

|                                      |                                                                 |        |                              |                   |                                                                          |                                                                                                                                       |                             |                                                                                                                                                                   |
|--------------------------------------|-----------------------------------------------------------------|--------|------------------------------|-------------------|--------------------------------------------------------------------------|---------------------------------------------------------------------------------------------------------------------------------------|-----------------------------|-------------------------------------------------------------------------------------------------------------------------------------------------------------------|
|                                      |                                                                 |        |                              |                   | Hg                                                                       |                                                                                                                                       |                             | complaints of cognitive functioning (MD for total score 0.45 (0.02, 0.87) and more complaints of dysexecutive functioning, but not significant 0.31 (-0.11, 0.73) |
| Love et al, <sup>34</sup> 2012       | All children born to mothers in Aberdeen city between 1995-2008 | Cohort | Aberdeen, Scotland 1995-2008 | PE 1774, NT 23334 | PE: Davey and MacGillivray's classification of HDP                       | Congenital abnormality, cerebral palsy, autism, ADHD, developmental delay, communication difficulties/learning difficulties and other | Record in SNS               | NT v PE:<br>No significant association<br>OR and 95% CI:<br>0.80 (0.60, 1.07)                                                                                     |
| Whitehouse et al, <sup>35</sup> 2012 | Offspring, age 10 years                                         | Cohort | Western Australia 1989-91    | PE 34, NT 1076    | PE: gestational HT with proteinuria of $\geq 300\text{mg}/24\text{hr}$ . | Neurocognitive development                                                                                                            | PPVT-R and RCPM             | PE not associated with lower PPVT-R scores (MD for total score -3.35 (-8.41, 1.35) or lower RCPM scores (MD for total score -1.82 (-12.59, 8.95))                 |
| Ehrenstein et al, <sup>36</sup> 2009 | Men born in 1978-83                                             | Cohort | Northern Denmark 1978-83     | PE 604, NT 16566  | PE: BP >140/90mm Hg in second half of                                    | Adult cognitive function                                                                                                              | BPP group intelligence test | PE v NT:<br>PE associated with increased odds of low                                                                                                              |

|                                        |                          |              |                           |                                                     |                                                                                                                                                                                                   |                    |                                                                                                   |                                                                                                                              |
|----------------------------------------|--------------------------|--------------|---------------------------|-----------------------------------------------------|---------------------------------------------------------------------------------------------------------------------------------------------------------------------------------------------------|--------------------|---------------------------------------------------------------------------------------------------|------------------------------------------------------------------------------------------------------------------------------|
|                                        |                          |              |                           |                                                     | pregnancy and de novo proteinuria (>0.3g over 24hrs) or edema                                                                                                                                     |                    |                                                                                                   | cognitive function PR and 95% CI: 1.32 (1.08, 1.62)                                                                          |
| Eaton et al, <sup>17</sup> 2001        | Offspring, age <15 years | Case-control | Denmark 1973-93           | Learning disorders 580, reference population 102905 | Eclampsia from Medical Birth Register                                                                                                                                                             | Learning disorders | ICD8                                                                                              | Eclampsia v NT: No significant association RR: 0.9                                                                           |
| Seidman et al, <sup>37</sup> 1991      | Offspring, age 17 years  | Cohort       | Jerusalem, Israel 1964-71 | PE 428, No PE 33117                                 | PE: After 24 weeks gestation, SBP ≥140mm Hg or DBP ≥90mm Hg or rise in BP of ≥30/15mm Hg (two readings ≥6hrs apart) or proteinuria or oedema of the face and arms or any combination of 2 or more | Intelligence score | Verbal Otis test and nonverbal matrices test transformed into values that correlate with the WAIS | No difference in mean IQ test scores between PE and non PE: mean 109.3 (1.2) v 110.9 (0.1)                                   |
| Barker and Edwards, <sup>38</sup> 1967 | Offspring, age 11 years  | Cohort       | Birmingham, UK 1950-54    | Toxemia 3321, No toxemia 42329                      | Toxemia: HT or albuminuria during pregnancy                                                                                                                                                       | Verbal reasoning   | Eleven-plus                                                                                       | Toxemia associated with lower verbal reasoning within sibpairs (MD in unaffected sibs in subsequent birth -0.7 and pre-eding |

| <b>Pre-eclampsia (specific population)</b> |                                      |                     |                                            |                                          |                                                                                                                                                          |                                |                                                                           | birth -2.2)                                                                                                                                  |
|--------------------------------------------|--------------------------------------|---------------------|--------------------------------------------|------------------------------------------|----------------------------------------------------------------------------------------------------------------------------------------------------------|--------------------------------|---------------------------------------------------------------------------|----------------------------------------------------------------------------------------------------------------------------------------------|
| <b>Study</b>                               | <b>Population</b>                    | <b>Study design</b> | <b>Region, study period</b>                | <b>Sample size</b>                       | <b>Diagnosis of HDP</b>                                                                                                                                  | <b>Outcome measure</b>         | <b>Assessment method</b>                                                  | <b>Main findings</b>                                                                                                                         |
| Johnson et al, <sup>39</sup> 2015          | Late and moderately pre-term infants | Cohort              | East Midlands, United Kingdom 2009-10      | 638 completed questionnaire at follow-up | PE: self-reported                                                                                                                                        | Cognitive development at age 2 | PARCA-R                                                                   | PE associated with increased risk of cognitive impairment. RR and 95% CI: 2.51 (1.33, 4.70)                                                  |
| Morsing and Maršál, <sup>40</sup> 2014     | IUGR and very pre-term birth         | Cohort              | Lund University Hospital, Sweden 1998-2004 | PE 11, No PE 23                          | PE: >90mm Hg on 2 or more occasions and proteinuria >300mg/L                                                                                             | Cognitive impairment           | Wechsler scales                                                           | IUGR infants exposed to PE had significantly lower full-scale IQ compared to IUGR infants unexposed to PE: PE: 70.1 (±19) Non PE: 83.3 (±14) |
| Leitner et al, <sup>41</sup> 2012          | IUGR infants                         | Cohort              | Lis Maternity Hospital, Israel 1992-2002   | PE 17, NT 78                             | PE: SBP ≥140mm Hg or DBP ≥90mm Hg developing after 20 weeks gestation with proteinuria >0.3g in 24/hr urine sample or +2 in dipstick urine test, without | IQ and academic achievement    | WISC-R95 two-test short form and Kauffman Assessment Battery for Children | No significant differences observed between the groups                                                                                       |



|                                      |                                                          |        |                                                 |                   |                                                                                                                                                                                                                              |                                    |                                                              |                                                                                 |
|--------------------------------------|----------------------------------------------------------|--------|-------------------------------------------------|-------------------|------------------------------------------------------------------------------------------------------------------------------------------------------------------------------------------------------------------------------|------------------------------------|--------------------------------------------------------------|---------------------------------------------------------------------------------|
|                                      |                                                          |        |                                                 |                   | history of previous HT                                                                                                                                                                                                       |                                    |                                                              |                                                                                 |
| Leveresen et al, <sup>42</sup> 2011  | Children born extremely pre-term (22-27 weeks gestation) | Cohort | Norway 1999-2000                                | PE 73, No PE 233  | PE: Medical Birth Registry of Norway                                                                                                                                                                                         | Cognitive function at age 5        | Wechsler Preschool and Primary Scale of Intelligence-Revised | PE associated with lower full-scale IQ MD -7.7 (-12.7, -2.7)                    |
| Schlapbach et al, <sup>43</sup> 2010 | Pre-term infants <32 weeks gestation                     | Cohort | University Hospital Zurich, Switzerland 2002-05 | PE 33, No PE 33   | PE: proteinuria >300mg/d and DBP >90mm Hg in two measurements ≥4 hrs apart after 20th week gestation and regressing after delivery and/or acute spiral artery atherosclerosis on placental histology or placental bed biopsy | Adverse neurodevelopmental outcome | Bayley Scales of Infant Development II: MDI<70 and/or PDI<70 | No association: PE v No PE: OR and 95% CI: 1.36 (0.46, 4.04)                    |
| Spinillo et al, <sup>44</sup> 2009   | Pre-term infants (24-33 weeks gestation)                 | Cohort | Pavia, Italy 1990-2004                          | PE 185, No PE 569 | PE: DBP ≥110mm Hg or ≥90mm Hg in two consecutive measures at any time during pregnancy and proteinuria ≥300mg/day                                                                                                            | MDI                                | Bayley Scales of Infant Development II                       | PE associated with reduced risk of impairment. OR and 95% CI: 0.52 (0.32, 0.85) |
| Silveira et al, <sup>45</sup> 2007   | VLBW infants                                             | Cohort | Hospital de Clínicas de                         | PE 40, No PE 46   | PE: SBP ≥140mm Hg                                                                                                                                                                                                            | MDI at 12 and 18 months            | Bayley Scales of Infant                                      | Mean MDI scores not                                                             |

|                                 |                                    |        |                                        |                 |                                                                                                                                                                  |                      |                                        |                                                                                                                                                                           |
|---------------------------------|------------------------------------|--------|----------------------------------------|-----------------|------------------------------------------------------------------------------------------------------------------------------------------------------------------|----------------------|----------------------------------------|---------------------------------------------------------------------------------------------------------------------------------------------------------------------------|
|                                 |                                    |        | Porto Alegre, Brazil 2003-05           |                 | and/or DBP $\geq 90$ mm Hg developing after 20 weeks gestation with proteinuria $>300$ mg in 24/hr urine sample, without history of previous HT or renal disease |                      | Development II                         | significantly different.<br>At 12 months:<br>PE: 79.6 ( $\pm 0.44$ )<br>No PE: 79 ( $\pm 0.47$ )<br>At 18 months:<br>PE: 82.9 ( $\pm 0.45$ )<br>No PE: 81.1 ( $\pm 0.7$ ) |
| Cheng et al, <sup>46</sup> 2004 | VLBW infants $<32$ weeks gestation | Cohort | Taiwan 1997-99                         | PE 28, No PE 61 | PE: DBP of 110mm Hg once or DBP of $\geq 90$ mm Hg twice and proteinuria of $\geq 300$ mg in 24/hr                                                               | MDI                  | Bayley Scales of Infant Development II | Median MDI score significantly lower for PE compared to non-PE:<br>PE: 72 (49-116)<br>Non-PE: 86 (49-114)<br>$p=0.04$                                                     |
| Many et al, <sup>47</sup> 2003  | Children born growth restricted    | Cohort | Lis Maternity Hospital, Israel 1992-93 | PE 11, No PE 64 | PE: persistent BP $\geq 140/90$ mm Hg with proteinuria of 100mg/dL by random urine analysis or $>500$ mg in 24hr urine collection                                | Cognitive assessment | Stanford Binnet-IQ                     | Growth restricted infants exposed to PE had significantly lower IQ scores compared to unexposed growth restricted:<br>PE: 85.5 ( $\pm 16$ )<br>Non PE: 96.9 ( $\pm 18$ )  |

| Szymonowicz et al, <sup>48</sup> 1987 | VLBW infants              | Cohort       | Australia 1982-84                          | PE 35, No PE 35                                    | Severe PE: >140/90mm Hg, persistent proteinuria with UTI and generalised oedema <32 weeks gestation                                                                                                                                                                                      | MDI                                | Bayley Scales of Infant Development II                                     | PE associated with significantly lower mean MDI<br>PE: 94<br>No PE: 106                                                                                                           |
|---------------------------------------|---------------------------|--------------|--------------------------------------------|----------------------------------------------------|------------------------------------------------------------------------------------------------------------------------------------------------------------------------------------------------------------------------------------------------------------------------------------------|------------------------------------|----------------------------------------------------------------------------|-----------------------------------------------------------------------------------------------------------------------------------------------------------------------------------|
| <b>Other HDP</b>                      |                           |              |                                            |                                                    |                                                                                                                                                                                                                                                                                          |                                    |                                                                            |                                                                                                                                                                                   |
| Study                                 | Population                | Study design | Region, study period                       | Sample size                                        | Diagnosis of HDP                                                                                                                                                                                                                                                                         | Outcome measure                    | Assessment method                                                          | Main findings                                                                                                                                                                     |
| Heikura et al, <sup>32</sup> 2013     | Offspring, age 11.5 years | Cohort       | Oulu and Lapland, Northern Finland 1985-86 | GH 443, Chronic HT or superimposed PE 564, NT 6897 | GH: BP ≥140/90mm Hg Chronic HT or superimposed PE: already using anti-HT medication at the beginning of pregnancy or having blood pressure ≥140/90 mmHg before week 20 classified as having chronic hypertension. With a positive urinary dipstick test (≥0.3 g/L) indicated proteinuria | Mild cognitive limitations         | IQ between 50 and 85 based on standardised psychometric tests (eg. WISC-R) | GH v NT: GH associated with increased odds of mild cognitive limitations OR and 95% CI: 2.4 (1.4, 3.9). Chronic HT v NT: No significant association OR and 95% CI: 1.4 (0.8, 2.5) |
| Tuovinen et al, <sup>33</sup> 2013    | Offspring, 70 years later | Cohort       | Helsinki, Finland 1934-44                  | HT 292, NT 553                                     | Gestational and chronic HT: SBP ≥140mm Hg or DBP ≥90mm                                                                                                                                                                                                                                   | Self-reported cognitive impairment | CFQ and DEX                                                                | HT associated with more complaints of cognitive functioning                                                                                                                       |

|                                    |                                                                 |              |                              |                                                 |                                                          |                                                                                                                                       |                                                                                                         |                                                                                                                                            |
|------------------------------------|-----------------------------------------------------------------|--------------|------------------------------|-------------------------------------------------|----------------------------------------------------------|---------------------------------------------------------------------------------------------------------------------------------------|---------------------------------------------------------------------------------------------------------|--------------------------------------------------------------------------------------------------------------------------------------------|
|                                    |                                                                 |              |                              |                                                 | Hg at <20 weeks gestation, without proteinuria           |                                                                                                                                       |                                                                                                         | (MD for total score 0.12 (-0.04, 0.27) and more complaints of dysexecutive functioning, 0.07 (-0.08, 0.22), but neither result significant |
| Krakowiak et al, <sup>8</sup> 2012 | Offspring, age 2-5 years                                        | Case-control | California 2003-10           | Developmental delay 64, typical development 172 | HT (with or without PE) self-reported or medical records | Developmental delay                                                                                                                   | Vineland Adaptive Behaviour Scales, Mullen Scales of Early Learning, Social Communication Questionnaire | HT v NT: No significant association OR and 95% CI: 3.58 (0.93, 13.78)                                                                      |
| Love et al, <sup>34</sup> 2012     | All children born to mothers in Aberdeen city between 1995-2008 | Cohort       | Aberdeen, Scotland 1995-2008 | GH 4092, NT 23334                               | GH: Davey and MacGillivray's classification of HDP       | Congenital abnormality, cerebral palsy, autism, ADHD, developmental delay, communication difficulties/learning difficulties and other | Record in SNS                                                                                           | NT v GH: No significant association OR and 95% CI: 1.16 (0.99, 1.36)                                                                       |
| Tuovinen et al, <sup>49</sup> 2012 | Men (military service), age 20 years                            | Cohort       | Helsinki, Finland 1934-44    | HT 449, NT 747                                  | HDP: BP ≥140/90mm Hg at any time during pregnancy        | Intellectual abilities at military service                                                                                            | Finnish Defence Forces Basic Ability Test                                                               | MD and 95% CI in total intellectual abilities score: -0.12 (-0.24, -0.00)                                                                  |
| Tuovinen et al, <sup>50</sup> 2012 | Men (military service),                                         | Cohort       | Helsinki, Finland 1934-44    | HT 146, NT 252                                  | HDP: BP ≥140/90mm Hg at any time                         | Intellectual abilities at military service                                                                                            | Finnish Defence Forces Basic                                                                            | Men born to HT mothers scored lower                                                                                                        |

|                                      |                         |        |                           |                       |                                                                                            |                            |                             |                                                                                                                                                                  |
|--------------------------------------|-------------------------|--------|---------------------------|-----------------------|--------------------------------------------------------------------------------------------|----------------------------|-----------------------------|------------------------------------------------------------------------------------------------------------------------------------------------------------------|
|                                      | age 20 and 69 years     |        |                           |                       | during pregnancy                                                                           |                            | Ability Test                | on tests: MD and 95% CI in total intellectual abilities score at age 69: -4.36 (-7.55, -1.17) and in decline in total cognitive ability -2.88 (-5.06, -0.70)     |
| Whitehouse et al, <sup>35</sup> 2012 | Offspring, age 10 years | Cohort | Western Australia 1989-91 | PE 279, NT 1076       | Gestational HT: SBP ≥140mm Hg or DBP ≥90mm Hg in women normotensive at <24 weeks gestation | Neurocognitive development | PPVT-R and RCPM             | HT associated with lower PPVT-R scores (MD for total score -1.71 (-3.39, -0.03) but not associated with lower RCPM scores (MD for total score 0.15 (-3.60, 3.90) |
| Ehrenstein et al, <sup>36</sup> 2009 | Men born in 1978-83     | Cohort | Northern Denmark 1978-83  | GH 287, NT 16566      | GH: BP >140/90mm Hg in second half of pregnancy                                            | Adult cognitive function   | BPP group intelligence test | GH v NT: GH associated with increased odds of low cognitive function PR and 95% CI: 1.34 (1.01, 1.77)                                                            |
| Lawlor et al, <sup>51</sup> 2005     | Offspring, age 7, 9 and | Cohort | Aberdeen, Scotland        | PIH 1977, No PIH 9702 | PIH: PE or GH from Aberdeen                                                                | Childhood intelligence     | Age 7: Moray House Picture  | PIH v No PIH: MD in IQ                                                                                                                                           |

|                                        | 11 years                                     |              | 1950-56                                  |                       | Maternal and Neonatal Database                                                                       |                             | Intelligence 1&2.<br>Age 9: Schonell and Adams Essential Intelligence form A&B.<br>Age 11: battery of Moray House Tests (2 verbal reasoning, arithmetic and English) | points and 95% CI: 2.35 (1.56, 3.14)<br>Results attenuated towards the null when adjusted for parental characteristics |
|----------------------------------------|----------------------------------------------|--------------|------------------------------------------|-----------------------|------------------------------------------------------------------------------------------------------|-----------------------------|----------------------------------------------------------------------------------------------------------------------------------------------------------------------|------------------------------------------------------------------------------------------------------------------------|
| <b>Other HDP (specific population)</b> |                                              |              |                                          |                       |                                                                                                      |                             |                                                                                                                                                                      |                                                                                                                        |
| Study                                  | Population                                   | Study design | Region, study period                     | Sample size           | Diagnosis of HDP                                                                                     | Outcome measure             | Assessment method                                                                                                                                                    | Main findings                                                                                                          |
| Leitner et al, <sup>41</sup> 2012      | IUGR infants                                 | Cohort       | Lis Maternity Hospital, Israel 1992-2002 | GH 25, NT 78          | GH: SBP ≥140mm Hg or DBP ≥90mm Hg developing after 20 weeks gestation without history of previous HT | IQ and academic achievement | WISC-R95 two-test short form and Kauffman Assessment Battery for Children                                                                                            | No significant differences observed between the groups                                                                 |
| Many 2005                              | Children born with severe growth restriction | Cohort       | Israel<br>Date: NR                       | HDP 22,<br>No HDP 70  | HDP: NR                                                                                              | IQ at age 6                 | Wechsler Preschool and Primary Scale of Intelligence                                                                                                                 | No significant difference in mean IQ<br>HDP: 106 (±11)<br>No HDP: 101 (±14)                                            |
| McCowan et al, <sup>52</sup> 2002      | SGA children (birthweight)                   | Cohort       | New Zealand 1993-97                      | HDP 88,<br>No HDP 132 | HDP: BP ≥140/90mm Hg with an                                                                         | MDI                         | Bayley Scales of Infant Development II                                                                                                                               | HDP associated with higher                                                                                             |

|                                       |                                               |        |                                                      |                                     |                                                                                                                                                                                                               |                                             |                                                       |                                                                                              |
|---------------------------------------|-----------------------------------------------|--------|------------------------------------------------------|-------------------------------------|---------------------------------------------------------------------------------------------------------------------------------------------------------------------------------------------------------------|---------------------------------------------|-------------------------------------------------------|----------------------------------------------------------------------------------------------|
|                                       | <10th centile)                                |        |                                                      |                                     | increase of $\geq 15$ mm Hg in DBP on 2 occasions >4hrs apart after 20 weeks gestation and/or proteinuria of >300mg/24hr and/or at least +2 proteinuria on repeated testing with urine dipsticks, without UTI |                                             |                                                       | MDI scores.<br>Mean MDI:<br>HDP: 98.6<br>No HDP: 93.7                                        |
| Gray et al, <sup>53</sup><br>1998     | Very pre-term infants (24-32 weeks gestation) | Cohort | Mater Mother's Hospital, Brisbane, Australia 1992-93 | Maternal HT 107, No maternal HT 107 | Maternal HT: Australasian Society for the Study of Hypertension in Pregnancy                                                                                                                                  | Developmental delay                         | Griffith's Infant Ability Scale                       | Maternal HT not associated with developmental delay<br>OR and 95% CI:<br>1.33 (0.61, 2.99)   |
| Spinillo et al, <sup>54</sup><br>1994 | Pre-term infants (24-35 weeks gestation)      | Cohort | Italy 1986-90                                        | HDP 92, No HDP 184                  | HDP: Davey and MacGillivray                                                                                                                                                                                   | Minor neurodevelopmental impairment         | Bayley Scale of Infant Development                    | HDP associated with increased risk of minor impairment<br>OR and 95% CI:<br>3.1 (1.41, 6.88) |
| Winer et al, <sup>55</sup><br>1982    | SGA infants (<10th centile)                   | Cohort | USA 1973-76                                          | HDP 20, No HDP 35                   | HDP: American College of Obstetricians                                                                                                                                                                        | Verbal IQ, performance IQ and full-scale IQ | Wechsler Preschool and Primary Scales of Intelligence | HDP associated with higher verbal IQ                                                         |

|  |  |  |  |  |                       |  |                                                                 |                                                                                                                                                                 |
|--|--|--|--|--|-----------------------|--|-----------------------------------------------------------------|-----------------------------------------------------------------------------------------------------------------------------------------------------------------|
|  |  |  |  |  | and<br>Gynaecologists |  | or WISC-R and<br>Raven's<br>Coloured<br>Progressive<br>Matrices | score<br>Mean and SD:<br>HDP: 105.75<br>(13.50)<br>No HDP:<br>93.68 (12.84)<br>No significant<br>differences<br>observed for<br>performance<br>or full-scale IQ |
|--|--|--|--|--|-----------------------|--|-----------------------------------------------------------------|-----------------------------------------------------------------------------------------------------------------------------------------------------------------|

**Summary of HDP and other behavioral outcome studies**

***Pre-eclampsia***

| <b>Study</b>                          | <b>Population</b>                                  | <b>Study design</b> | <b>Region,<br/>study period</b> | <b>Sample size</b> | <b>Diagnosis of<br/>HDP</b>                                                                 | <b>Outcome<br/>measure</b>                                 | <b>Assessment<br/>method</b> | <b>Main findings</b>                                                                                                                                                                                                                                   |
|---------------------------------------|----------------------------------------------------|---------------------|---------------------------------|--------------------|---------------------------------------------------------------------------------------------|------------------------------------------------------------|------------------------------|--------------------------------------------------------------------------------------------------------------------------------------------------------------------------------------------------------------------------------------------------------|
| Robinson et al, <sup>56</sup><br>2009 | Offspring at<br>age 2, 5, 8,<br>10 and 14<br>years | Cohort              | Western<br>Australia<br>1989-91 | PE: 80<br>NT: 2119 | PE: BP<br>≥140/90mm<br>Hg after 24<br>weeks<br>gestation and<br>proteinuria<br>(≥0.3g/24hr) | Behavioural<br>problems in<br>childhood and<br>adolescence | CBCL                         | No significant<br>association<br>between PE<br>and overall<br>behavioural<br>problems.<br>Protective<br>relationship<br>observed<br>between PE<br>and<br>internalising<br>behaviour<br>problems at<br>age 5 and 8.<br>OR and 95%<br>CI:<br>0.22 (0.05, |



|                                   |                                                      |                     |                             |                                                      |                                       |                                   |                                                                 |                                                                                         |
|-----------------------------------|------------------------------------------------------|---------------------|-----------------------------|------------------------------------------------------|---------------------------------------|-----------------------------------|-----------------------------------------------------------------|-----------------------------------------------------------------------------------------|
|                                   |                                                      |                     |                             |                                                      |                                       |                                   |                                                                 | 0.97)<br>0.33 (0.11,<br>0.98)                                                           |
| Wu et al, <sup>57</sup> 2009      | All singletons born in Denmark between 1978 and 2004 | Cohort              | Denmark 1978-2004           | PE 46384,<br>No PE 1499059                           | PE: ICD8 and ICD10                    | Disease specific hospitalisations | Hospitalisation as a result of mental and behavioural disorders | PE not associated with increased risk of hospitalisation IRR and 95% CI: 1.1 (1.0, 1.2) |
| Glasson et al, <sup>15</sup> 2004 | Western Australia, born between 1980 and 1995        | Case-control        | Western Australia 1980-95   | PDD-NOS 84, controls 1313, siblings of cases 481     | PE: ICD9                              | PDD-NOS                           | DSM                                                             | No association between PE and PDD-NOS: OR and 95% CI: 1.2 (0.5, 2.6)                    |
| Glasson et al, <sup>15</sup> 2004 | Western Australia, born between 1980 and 1995        | Case-control        | Western Australia 1980-95   | Asperger's 67, controls 1313, siblings of cases 481  | PE: ICD9                              | Asperger's                        | DSM                                                             | No association between PE and Asperger's: OR and 95% CI: 1.3 (0.6, 3.0)                 |
| Eaton et al, <sup>17</sup> 2001   | Offspring, age <15 years                             | Case-control        | Denmark 1973-93             | Asperger's Syndrome 279, reference population 102905 | Eclampsia from Medical Birth Register | Asperger's Syndrome               | ICD                                                             | Eclampsia v NT: No significant association RR: 1.06                                     |
| <b>Other HDP</b>                  |                                                      |                     |                             |                                                      |                                       |                                   |                                                                 |                                                                                         |
| <b>Study</b>                      | <b>Population</b>                                    | <b>Study design</b> | <b>Region, study period</b> | <b>Sample size</b>                                   | <b>Diagnosis of HDP</b>               | <b>Outcome measure</b>            | <b>Assessment method</b>                                        | <b>Main findings</b>                                                                    |
| Böhm et al, <sup>21</sup> 2017    | Millennium Cohort, age 7                             | Cohort              | United Kingdom 2001-08      | HDP 1069, No HDP 12431                               | HDP: self-reported (includes          | Behavioural difficulties          | SDQ                                                             | No association between HDP and abnormal                                                 |

|                                       |                                               |              |                           |                                        |                                                                         |                                                   |                |                                                                                                                                                                                                                                      |
|---------------------------------------|-----------------------------------------------|--------------|---------------------------|----------------------------------------|-------------------------------------------------------------------------|---------------------------------------------------|----------------|--------------------------------------------------------------------------------------------------------------------------------------------------------------------------------------------------------------------------------------|
|                                       |                                               |              |                           |                                        | raised BP, eclampsia, PE or toxemia).                                   |                                                   |                | SDQ:<br>OR and 95% CI:<br>0.94 (0.69, 1.29)                                                                                                                                                                                          |
| Polo-Kantola et al, <sup>3</sup> 2014 | Singleton births in Finland between 1990-2005 | Case-control | Finland 1990-2005         | PDD 1602, Controls 6371                | Maternal HT: (includes PE and pregnancy induced HT) $\geq 140/90$ mm Hg | PDD                                               | ICD9 and ICD10 | No association when results adjusted for SGA, other birth factors or neonatal treatment                                                                                                                                              |
| Polo-Kantola et al, <sup>3</sup> 2014 | Singleton births in Finland between 1990-2005 | Case-control | Finland 1990-2005         | Asperger's syndrome 1466 Controls 5839 | Maternal HT: (includes PE and pregnancy induced HT) $\geq 140/90$ mm Hg | Asperger's syndrome                               | ICD9 and ICD10 | No association OR and 95% CI: 1.03 (0.8, 1.4)                                                                                                                                                                                        |
| Robinson et al, <sup>56</sup> 2009    | Offspring at age 2, 5, 8, 10 and 14 years     | Cohort       | Western Australia 1989-91 | GH: 605 NT: 2119                       | GH: BP $\geq 140/90$ mm Hg after 24 weeks gestation                     | Behavioural problems in childhood and adolescence | CBCL           | GH associated with increased risk of overall behavioural problems at age 8 and 14. OR and 95% CI: 1.40 (1.03, 1.91) 2.07 (1.35, 3.17) Also associated with increased risk of externalising behavioural problems at age 10 OR and 95% |

|                                                           |                                                 |              |                           |                                                                        |                                            |                                |                                                                             | CI:<br>1.63 (1.13,<br>2.33)                                                                                                               |
|-----------------------------------------------------------|-------------------------------------------------|--------------|---------------------------|------------------------------------------------------------------------|--------------------------------------------|--------------------------------|-----------------------------------------------------------------------------|-------------------------------------------------------------------------------------------------------------------------------------------|
| <b>Summary of HDP and intellectual disability studies</b> |                                                 |              |                           |                                                                        |                                            |                                |                                                                             |                                                                                                                                           |
| <b>Pre-eclampsia</b>                                      |                                                 |              |                           |                                                                        |                                            |                                |                                                                             |                                                                                                                                           |
| Study                                                     | Population                                      | Study design | Region, study period      | Sample size                                                            | Diagnosis of HDP                           | Outcome measure                | Assessment method                                                           | Main findings                                                                                                                             |
| Griffith et al, <sup>58</sup> 2011                        | Live births in South Carolina between 1996-2002 | Cohort       | South Carolina 1996-2002  | PE 5169,<br>No PE 75697                                                | PE or eclampsia:<br>ICD9                   | Intellectual disability        | Whether a child received special education or ID-related services from DDSN | PE associated with an increased risk of ID<br>OR and 95% CI:<br>1.38 (1.16, 1.64)                                                         |
| Eaton, et al, <sup>17</sup> 2001                          | Offspring, age <15 years                        | Case-control | Denmark 1973-93           | Mental retardation 201,<br>reference population 102905                 | Eclampsia from Medical Birth Register      | Mental retardation             | ICD                                                                         | Eclampsia associated with statistically significant increased risk of mental retardation<br>RR: 3.03                                      |
| <b>Other HDP</b>                                          |                                                 |              |                           |                                                                        |                                            |                                |                                                                             |                                                                                                                                           |
| Study                                                     | Population                                      | Study design | Region, study period      | Sample size                                                            | Diagnosis of HDP                           | Outcome measure                | Assessment method                                                           | Main findings                                                                                                                             |
| Langridge et al, <sup>4</sup> 2013                        | All singleton births in Western Australia       | Cohort       | Western Australia 1984-99 | Mild-moderate ID 4339,<br>severe ID 237,<br>unaffected children 376529 | Pregnancy HT: PE and essential HT from MNS | Mild-moderate ID and severe ID | American Association on Mental Retardation classification system            | Pregnancy HT associated with increased risk of mild-moderate ID:<br>OR and 95% CI:<br>1.39 (1.25, 1.54) but not severe ID:<br>1.01 (0.64, |

|                                   |                                                               |              |                               |                                      |                                               |                         |                                                                               |                                                                                                                                        |
|-----------------------------------|---------------------------------------------------------------|--------------|-------------------------------|--------------------------------------|-----------------------------------------------|-------------------------|-------------------------------------------------------------------------------|----------------------------------------------------------------------------------------------------------------------------------------|
|                                   |                                                               |              |                               |                                      |                                               |                         |                                                                               | 1.59)                                                                                                                                  |
| Leonard et al, <sup>59</sup> 2006 | Children born in Western Australia between 1983-92            | Cohort       | Western Australia 1983-92     | HT 1379, No HT 238450                | HT: ICD9                                      | Intellectual disability | Mild-moderate ID: IQ 35 to 40 to 69<br>Severe ID: IQ<35 or 40 based on DSM-IV | No significant association.<br>Mild-moderate ID:<br>OR and 95% CI: 0.99 (0.58, 1.68)<br>Severe ID:<br>OR and 95% CI: 2.48 (0.79, 7.77) |
| Salonen, et al <sup>60</sup> 1984 | Children age 9-10 years living in one Finnish county (Kuopio) | Case-control | Eastern Finland 1979 and 1981 | Mental retardation 136, Controls 122 | HT during pregnancy: confirmed by a physician | Mental retardation      | Screened using a standardised set of tests for mental performance             | HT during pregnancy associated with increased risk of mental retardation<br>RR and 95% CI:<br>6.1 (1.3, 28.9)                          |

HDP=hypertensive disorder of pregnancy. PE=pre-eclampsia. BP=blood pressure. NT=normotensive. CFQ=Cognitive Failures Questionnaire. DEX=Dysexecutive Questionnaire. MD=mean difference. SNS=Support Needs System. PPVT-R=Peabody Picture Vocabulary Test-Revised. RCPM=Ravens Colored Progressive Matrices. BPP=Boerge Prien Prove. ICD=International Classification of Disease. WAIS=Wechsler Adult Intelligence Scale. HT=hypertension. PARCA-R=Parent Report of Children's Abilities-Revised. IUGR=Intrauterine growth restricted. WISC-R=Wechsler Intelligence Scale for Children-Revised. DBP=diastolic blood pressure. MDI=Mental Developmental Index. PDI=Psychomotor Developmental Index. VLBW=Very low birthweight. GH=gestational hypertension. NT=normotensive. SBP=systolic blood pressure. PIH=pregnancy-induced hypertension. NR=not recorded. SGA=small for gestational age. UTI=urinary tract infection. CBCL=Child Behaviour Checklists. PDD-NOS=Pervasive Developmental Disorder-Not Otherwise Specified. DSM=Diagnostic and Statistical Manual of Mental Disorders. SDQ= Strengths and Difficulties Questionnaire. ID=intellectual disability. DDSN=Department of Disabilities and Special Needs. MNS=Midwives' Notification System.

| <b>eTable 5. Level of Bias in ASD Studies</b> |                                                                                                                                              |                                                                            |                                                                                        |                                                                                                                                                                                                      |                                                                                                       |                                                                                                               |                             |
|-----------------------------------------------|----------------------------------------------------------------------------------------------------------------------------------------------|----------------------------------------------------------------------------|----------------------------------------------------------------------------------------|------------------------------------------------------------------------------------------------------------------------------------------------------------------------------------------------------|-------------------------------------------------------------------------------------------------------|---------------------------------------------------------------------------------------------------------------|-----------------------------|
| <b>Study</b>                                  | <b>Selection bias</b>                                                                                                                        | <b>Exposure bias</b>                                                       | <b>Outcome bias</b>                                                                    | <b>Confounding</b>                                                                                                                                                                                   | <b>Analytic bias</b>                                                                                  | <b>Attrition bias</b>                                                                                         | <b>Overall risk of bias</b> |
| Curran et al, <sup>1</sup> 2017               | Minimal: Sample selected from general population rather than a select group (Sample is representative of children born in the UK in 2000-01) | Low: Recall < 1 year after birth                                           | Minimal: Direct question to mother about outcome (doctor diagnosed maternal reporting) | Low: Certain confounders assessed - smoking during pregnancy, birth order, poverty, maternal ethnicity, age, education, depression, BMI, longstanding diabetes, longstanding HT                      | Low: Sample size calculation not performed, but all available eligible patients studied               | Moderate: >20% attrition                                                                                      | Low                         |
| Walker et al, <sup>2</sup> 2015               | Low: Sample from select group of population - only births in California who lived in catchment areas                                         | Minimal: Direct questioning supplemented with medical records              | Minimal: Previous ASD diagnoses were examined with validated measures                  | Low: Certain confounders assessed - maternal educational level, parity, pre-pregnancy obesity, age, sex, broad geographic regions within the study catchment areas                                   | Low: Sample size calculation not performed, but all available eligible patients may have been studied | Minimal: Little to no attrition                                                                               | Low                         |
| Polo-Kantola et al, <sup>3</sup> 2014         | Minimal: Sample selected from general population rather than a select group                                                                  | Low: Assessment of exposure from a dataset                                 | Low: Assessment from administrative database                                           | Low: Certain confounders assessed - maternal age, maternal smoking during pregnancy, number of previous births, maternal psychiatric history, sex, date of birth, place of birth                     | Minimal: Analyses appropriate for type of sample - conditional logistic regression                    | Minimal: All subjects from initiation of study to final outcome assessment were accounted for                 | Low                         |
| Langridge et al, <sup>4</sup> 2013            | Minimal: Consecutive unselected population                                                                                                   | Low: Assessment of exposure from a dataset - Midwives' Notification System | Low: Assessment from administrative database                                           | Low: Certain confounders assessed - birth year, maternal and pregnancy conditions (maternal diabetes, threatened abortion, asthma, UTI during pregnancy, placenta praevia, placenta abruption, other | Low: Sample size calculation not performed, but all available eligible patients studied               | Minimal: All subjects from initiation of study to final outcome assessment were accounted for (Registry data) | Low                         |

|                                        |                                                                                                                                                                                |                                                                                      |                                                                                                   |                                                                                                                                                                                                                                                                                                                                                                                                                                    |                                                                                         |                                                                                               |          |
|----------------------------------------|--------------------------------------------------------------------------------------------------------------------------------------------------------------------------------|--------------------------------------------------------------------------------------|---------------------------------------------------------------------------------------------------|------------------------------------------------------------------------------------------------------------------------------------------------------------------------------------------------------------------------------------------------------------------------------------------------------------------------------------------------------------------------------------------------------------------------------------|-----------------------------------------------------------------------------------------|-----------------------------------------------------------------------------------------------|----------|
|                                        |                                                                                                                                                                                |                                                                                      |                                                                                                   | antepartum haemorrhage), socio-demographics (parity, maternal and paternal age group, maternal ethnicity, community-level socioeconomic status and community accessibility/remoteness), labour and delivery factors (preterm type, mode of delivery, breech, any complication of labour or delivery), neonatal outcomes (infant gender, resuscitation required at birth, percentage of optimal birthweight and head circumference) |                                                                                         |                                                                                               |          |
| Mrozek-Budzyn et al, <sup>5</sup> 2013 | Low: Sample from select group of population - cases from the one psychiatric outpatient clinic for children in the area. Controls identified through outpatient clinic records | Moderate: Medical records and/or interview with trained nurse 2-15 years after birth | Minimal: Cases identified using medical records from a psychiatric outpatient clinic for children | Moderate: Not assessed for confounders (but matched by year of birth, sex and general practitioners)                                                                                                                                                                                                                                                                                                                               | Low: Sample size calculation not performed, but all available eligible patients studied | Minimal: All subjects from initiation of study to final outcome assessment were accounted for | Moderate |
| Nath et al, <sup>6</sup> 2012          | Moderate: Sample selection ambiguous but sample may be representative                                                                                                          | Moderate: Recall 1-5 years after birth                                               | Minimal: DSM IV-TR                                                                                | Moderate: Not assessed for confounders (but matched age)                                                                                                                                                                                                                                                                                                                                                                           | Moderate: Sample size estimation unclear                                                | Minimal: All subjects from initiation of study to final outcome assessment were accounted for | Moderate |

|                                    |                                                                                             |                                                                                                          |                                                                                      |                                                                                                                                                                                                                                                                                                                             |                                                                                         |                                                                                               |          |
|------------------------------------|---------------------------------------------------------------------------------------------|----------------------------------------------------------------------------------------------------------|--------------------------------------------------------------------------------------|-----------------------------------------------------------------------------------------------------------------------------------------------------------------------------------------------------------------------------------------------------------------------------------------------------------------------------|-----------------------------------------------------------------------------------------|-----------------------------------------------------------------------------------------------|----------|
| Lyall et al, <sup>7</sup> 2012     | Low: A select group of population - nurses only, high education status                      | Low: Indirect assessment - mailed questionnaire                                                          | Moderate: Assessment from "close-ended" questions                                    | Low: Certain confounders assessed - race, marital status, income, spouse education, nurse's age at baseline, age at first birth, parity                                                                                                                                                                                     | Low: Sample size calculation not performed, but all available eligible patients studied | Moderate: >20% attrition                                                                      | Moderate |
| Krakowiak et al, <sup>8</sup> 2012 | Low: A select group of population - born in California, residing in specific catchment area | Minimal: Direct questioning supplemented with medical records                                            | Minimal: Cases confirmed by trained clinician                                        | Low: Certain confounders assessed - mother's age at delivery, race/ethnicity, education level, delivery payer, calendar time, age, gender, and regional centre catchment area                                                                                                                                               | Low: Sample size calculation not performed, but all available eligible patients studied | Minimal: Little to no attrition                                                               | Low      |
| Dodds et al, <sup>9</sup> 2011     | Minimal: Consecutive unselected population - all live births                                | Low: Assessment of exposure from a dataset - Perinatal Database                                          | Low: Assessment from administrative database                                         | Moderate: Not assessed for confounders                                                                                                                                                                                                                                                                                      | Low: Sample size calculation not performed, but all available eligible patients studied | Minimal: All subjects from initiation of study to final outcome assessment were accounted for | Low      |
| Burstyn et al, <sup>10</sup> 2010  | Minimal: Sample selected from general population rather than a select group                 | Low: Assessment of exposure from a dataset - delivery records held by Alberta Perinatal Health Programme | Low: Assessment from administrative database - ICD-9 codes linked to billing records | Low: Certain confounders assessed - maternal age, maternal weight, maternal height, pre-pregnancy diabetes, gestational diabetes, bleeding, smoking, poor weight gain, parity, mother's SES, presentation (breech etc.), type of labour, caesarean section, gestational age, birthweight, APGAR at 1 min and 5 mins, infant | Low: Sample size calculation not performed, but all available eligible patients studied | Moderate: >20% attrition                                                                      | Low      |

|                                        |                                                                                                              |                                                                     |                                                                            |                                                                                                                                                                                                                                                                                                                                    |                                                                                         |                                                                                               |     |
|----------------------------------------|--------------------------------------------------------------------------------------------------------------|---------------------------------------------------------------------|----------------------------------------------------------------------------|------------------------------------------------------------------------------------------------------------------------------------------------------------------------------------------------------------------------------------------------------------------------------------------------------------------------------------|-----------------------------------------------------------------------------------------|-----------------------------------------------------------------------------------------------|-----|
|                                        |                                                                                                              |                                                                     |                                                                            | sex, birth year.                                                                                                                                                                                                                                                                                                                   |                                                                                         |                                                                                               |     |
| Mann et al, <sup>11</sup> 2010         | Low: A select group of population - Medicaid Social Healthcare Programme                                     | Low: Assessment of exposure from a dataset                          | Low: Assessment from administrative database                               | Low: Certain confounders assessed - maternal age, race, alcohol use, educational attainment, year of birth, child's sex, and diagnosis with a high risk condition (alcohol use, tobacco use, down syndrome, fragile X syndrome, brain anomaly) and birthweight                                                                     | Low: Sample size calculation not performed, but all available eligible patients studied | Minimal: All subjects from initiation of study to final outcome assessment were accounted for | Low |
| Bilder et al, <sup>12</sup> 2009       | Low: A select group of population - 8 year olds, vast majority white                                         | Low: Birth certificate data                                         | Low: Assessment from administrative database                               | Moderate: Not assessed for confounders for prenatal factors (but matched by gender and birth year)                                                                                                                                                                                                                                 | Low: Sample size calculation not performed, but all available eligible patients studied | Minimal: All subjects from initiation of study to final outcome assessment were accounted for | Low |
| Buchmayer er et al, <sup>13</sup> 2009 | Low: A select group of population - overrepresentation of severe cases as inpatient care data available only | Low: Assessment of exposure from a dataset - Medical Birth Register | Low: Assessment from administrative database - Hospital Discharge Register | Low: Certain confounders assessed - parity, previous miscarriage, childless years, any maternal infection during pregnancy, season of delivery, diabetes mellitus, maternal age, smoking, maternal country of birth, whether the mother lived with the father, maternal schizophrenia, age, gender, birth year, and birth hospital | Minimal: Analyses appropriate for type of sample - conditional logistic regression      | Minimal: All subjects from initiation of study to final outcome assessment were accounted for | Low |
| Larsson et al, <sup>14</sup> 2005      | Minimal: Rational for case and control selection explained                                                   | Low: Assessment of exposure from                                    | Low: Assessment from                                                       | Moderate: Not assessed for confounders (but matched by gender, birth                                                                                                                                                                                                                                                               | Minimal: Analyses appropriate for                                                       | Minimal: All subjects from initiation of                                                      | Low |



|                                   |                                                                                                              |                                                                                          |                                                                                       |                                                                                                                                                                                                                                                                                                                        |                                                                                                                   |                                                                                               |     |
|-----------------------------------|--------------------------------------------------------------------------------------------------------------|------------------------------------------------------------------------------------------|---------------------------------------------------------------------------------------|------------------------------------------------------------------------------------------------------------------------------------------------------------------------------------------------------------------------------------------------------------------------------------------------------------------------|-------------------------------------------------------------------------------------------------------------------|-----------------------------------------------------------------------------------------------|-----|
|                                   |                                                                                                              | a dataset - Danish Medical Birth Register                                                | administrative database - Danish Psychiatric Register                                 | year and age)                                                                                                                                                                                                                                                                                                          | type of sample - conditional logistic regression                                                                  | study to final outcome assessment were accounted for                                          |     |
| Glasson et al, <sup>15</sup> 2004 | Minimal: Sample selected from general population rather than a select group                                  | Low: Assessment of exposure from a dataset - Maternal and Child Health Research Database | Low: Assessment from administrative database - Diagnosis and Service Delivery Records | Moderate: Not assessed for confounders (but matched by sex)                                                                                                                                                                                                                                                            | Minimal: Sample size calculation performed and adequate sample studied                                            | Minimal: All subjects from initiation of study to final outcome assessment were accounted for | Low |
| Hultman et al, <sup>16</sup> 2002 | Low: A select group of population - overrepresentation of severe cases as inpatient care data available only | Low: Assessment of exposure from a dataset - Swedish Medical Birth Register              | Low: Assessment from administrative database - Swedish Inpatient Register             | Low: Certain confounders assessed - maternal age, parity, smoking during pregnancy, mother's country of birth, diabetes, pregnancy bleeding, mode of delivery, season of birth, gestational age, birthweight for gestational age, Apgar score at 5 minutes, congenital malformations, sex, year, and hospital of birth | Minimal: Analyses appropriate for type of sample - conditional logistic regression                                | Minimal: All subjects from initiation of study to final outcome assessment were accounted for | Low |
| Eaton et al, <sup>17</sup> 2001   | Low: A select group of population - cases were hospitalised (more severe)                                    | Low: Assessment of exposure from a dataset - Medical Birth Register                      | Low: Assessment from administrative database - Danish Psychiatric Register            | Low: Certain confounders assessed - gender and year of birth                                                                                                                                                                                                                                                           | Low: Sample size calculation not performed, but all available eligible patients studied (Does not provide 95% CI) | Minimal: All subjects from initiation of study to final outcome assessment were accounted for | Low |

|                                          |                                                                                                      |                          |                                                                                 |                                                                 |                                                                                         |                                                                                               |          |
|------------------------------------------|------------------------------------------------------------------------------------------------------|--------------------------|---------------------------------------------------------------------------------|-----------------------------------------------------------------|-----------------------------------------------------------------------------------------|-----------------------------------------------------------------------------------------------|----------|
| Matsuishi et al, <sup>18</sup> 1999      | Low: A select group of population - NICU survivors in a Japanese hospital                            | Minimal: Medical records | Minimal: Diagnosis confirmed by two paediatric neurologists who used DSM-III-R  | Moderate: Not assessed for confounders                          | Low: Sample size calculation not performed, but all available eligible patients studied | Low: <10% attrition                                                                           | Low      |
| Mason-Brothers et al, <sup>19</sup> 1990 | Low: Epidemiological Survey of Utah                                                                  | Minimal: Medical records | Minimal: Diagnosed by at least 2 clinicians using DSM-III                       | Moderate: Not assessed for confounders (but matched by sibling) | Moderate: Sample size estimation unclear                                                | Minimal: All subjects from initiation of study to final outcome assessment were accounted for | Moderate |
| Deykin et al, <sup>20</sup> 1980         | Low: A select group of population - Massachusetts, referred by 19 medical and educational facilities | Minimal: Medical records | High: Assessment from non-validated sources - parent-reported symptoms by age 6 | Low: Certain confounders assessed - birth order, sibling        | Moderate: Sample size estimation unclear                                                | Low: Medical records located for 81% cases and 75% controls                                   | Moderate |

| <b>eTable 6. Level of Bias in ADHD Studies</b> |                                                                                                                                                             |                                                                           |                                                                                                                                      |                                                                                                                                                                                                                                                                                                                                                              |                                                                                    |                                                                                               |                             |
|------------------------------------------------|-------------------------------------------------------------------------------------------------------------------------------------------------------------|---------------------------------------------------------------------------|--------------------------------------------------------------------------------------------------------------------------------------|--------------------------------------------------------------------------------------------------------------------------------------------------------------------------------------------------------------------------------------------------------------------------------------------------------------------------------------------------------------|------------------------------------------------------------------------------------|-----------------------------------------------------------------------------------------------|-----------------------------|
| <b>Study</b>                                   | <b>Selection bias</b>                                                                                                                                       | <b>Exposure bias</b>                                                      | <b>Outcome bias</b>                                                                                                                  | <b>Confounding</b>                                                                                                                                                                                                                                                                                                                                           | <b>Analytic bias</b>                                                               | <b>Attrition bias</b>                                                                         | <b>Overall risk of bias</b> |
| Böhm et al, <sup>21</sup><br>2017              | Minimal: Sample selected from general population rather than a select group (when weighted, sample is representative of children born in the UK in 2000-01) | Low: Recall < 1 year after birth                                          | Minimal: Direct question to mother about outcome (doctor diagnosed maternal reporting)                                               | Low: Certain confounders assessed - alcohol during pregnancy, maternal education, maternal depression, maternal age, poverty status                                                                                                                                                                                                                          | Minimal: Analyses appropriate for type of sample - multivariate analysis           | Moderate: >20% attrition                                                                      | Low                         |
| Silva et al, <sup>22</sup><br>2014             | Minimal: Consecutive unselected population                                                                                                                  | Low: Assessment of exposure from a dataset - Midwives Notification System | Low: Assessment from administrative database - subjects dispensed stimulant medication from Monitoring of Drugs of Dependence System | Low: Certain confounders assessed - year of birth, gender, and socioeconomic status, marital status, parity, smoking, complications of pregnancy, onset of labor, augmentation of labor, complications of labor, type of delivery, child characteristics (gestational age, birthweight, average/small/large for gestational age) maternal age, Apgar at five | Minimal: Analyses appropriate for type of sample - conditional logistic regression | Minimal: All subjects from initiation of study to final outcome assessment were accounted for | Low                         |

|                                      |                                                                                            |                                                                                                        |                                                                                                                                             |                                                                                                                                                                                                                            |                                                                                         |                                                                                               |          |
|--------------------------------------|--------------------------------------------------------------------------------------------|--------------------------------------------------------------------------------------------------------|---------------------------------------------------------------------------------------------------------------------------------------------|----------------------------------------------------------------------------------------------------------------------------------------------------------------------------------------------------------------------------|-----------------------------------------------------------------------------------------|-----------------------------------------------------------------------------------------------|----------|
|                                      |                                                                                            |                                                                                                        |                                                                                                                                             | minutes                                                                                                                                                                                                                    |                                                                                         |                                                                                               |          |
| Cak and Gokler, <sup>23</sup> 2013   | Low: Sample from select group of population (30-36 weeks gestation in one hospital)        | Minimal: Medical records                                                                               | Minimal: Schedule for Affective Disorders and Schizophrenia for School Aged Children-Present and Lifetime Version semi-structured interview | Moderate: Not assessed for confounders                                                                                                                                                                                     | Low: Sample size calculation not performed, but all available eligible patients studied | Moderate: >20% attrition but reasons for loss of follow up explained                          | Moderate |
| Getahun et al, <sup>24</sup> 2013    | Minimal: Rational for case and control selection explained                                 | Low: Assessment of exposure from a dataset - Perinatal Service System and inpatient/outpatient records | Minimal: Clinically diagnosed (1CD9) on at least 2 separate visits or 1 visit and 2 refills of ADHD medication                              | Low: Certain confounders assessed - age at diagnosis, maternal age, education, smoking during pregnancy, parity, prenatal care, household income, psychosocial disorder during pregnancy, child race/ethnicity, and gender | Minimal: Analyses appropriate for type of sample - conditional logistic regression      | Minimal: All subjects from initiation of study to final outcome assessment were accounted for | Low      |
| Golmirzaei et al, <sup>25</sup> 2013 | Low: A select group of population - sample of 4-11 year old school children, Southern Iran | High: Recall >5 years after birth                                                                      | Minimal: Conner's Scales (those positive for ADHD were interviewed by psychiatrist using DSM-IV criteria)                                   | Moderate: Not assessed for confounders (but matched by age)                                                                                                                                                                | Moderate: Sample size estimation unclear                                                | Minimal: All subjects from initiation of study to final outcome assessment were accounted for | High     |
| Amiri et al, <sup>26</sup> 2012      | Moderate: Sample selection ambiguous but                                                   | Moderate: Recall >5 years after birth but supplemented with medical                                    | Minimal: Direct question to parent about outcome using                                                                                      | Moderate: Not assessed for confounders (but matched by                                                                                                                                                                     | Moderate: Sample size estimation unclear                                                | Minimal: All subjects from initiation of study to final outcome                               | Moderate |

|                                           | sample may be representative                                                | documents where possible                                                                           | ADHD Rating Scale - Parent Version                                                                                                 | age)                                                                                                                                                                      |                                                                                         | assessment were accounted for                                                                 |     |
|-------------------------------------------|-----------------------------------------------------------------------------|----------------------------------------------------------------------------------------------------|------------------------------------------------------------------------------------------------------------------------------------|---------------------------------------------------------------------------------------------------------------------------------------------------------------------------|-----------------------------------------------------------------------------------------|-----------------------------------------------------------------------------------------------|-----|
| Halmoy et al, <sup>27</sup> 2012          | Minimal: Sample selected from general population rather than a select group | Low: Assessment of exposure from a dataset - Medical Birth Registry of Norway                      | Low: Assessment from administrative database - Adult patients who were approved for stimulant treatment in Norway during 1997-2005 | Low: Certain confounders assessed - born in the same time period, year of birth, parity, age of mother at birth, educational level of mother and marital status of mother | Low: Sample size calculation not performed, but all available eligible patients studied | Minimal: All subjects from initiation of study to final outcome assessment were accounted for | Low |
| Ketzer et al, <sup>28</sup> 2012          | Minimal: Rational for case and control selection explained                  | Moderate: Recall >5 years after birth (however supplemented with medical records in 38% of sample) | Minimal: Three stage process at outpatient clinic                                                                                  | Low: Certain confounders assessed - age, gender, agoraphobia (anxiety disorder), maternal ADHD and cigarettes/day during pregnancy                                        | Minimal: Analyses appropriate for type of sample - conditional logistic regression      | Minimal: All subjects from initiation of study to final outcome assessment were accounted for | Low |
| Gustafsson and Källén, <sup>29</sup> 2011 | Minimal: Sample selected from general population rather than a select group | Low: Assessment of exposure from a dataset - Swedish Medical Birth Register                        | Low: Assessment from administrative database - Department of Child and Adolescent Psychiatry                                       | Moderate: Not assessed for confounders                                                                                                                                    | Low: Sample size calculation not performed, but all available eligible patients studied | Minimal: All subjects from initiation of study to final outcome assessment were accounted for | Low |
| Mann and McDermott, <sup>30</sup> 2011    | Low: A select group of population - Medicaid eligible women                 | Low: Assessment of exposure from a dataset - Medicaid billing data                                 | Low: Assessment from administrative database - Medicaid billing                                                                    | Low: Certain confounders assessed - GU infection, infant race, maternal age and education,                                                                                | Low: Sample size calculation not performed, but all available eligible patients studied | Minimal: All subjects from initiation of study to final outcome assessment were accounted     | Low |

|  |  |  |      |                                                                              |  |     |  |
|--|--|--|------|------------------------------------------------------------------------------|--|-----|--|
|  |  |  | data | alcohol and tobacco use, infant sex, birthweight, and oldest age in Medicaid |  | for |  |
|--|--|--|------|------------------------------------------------------------------------------|--|-----|--|

**eTable 7. Level of Bias in Other Neurodevelopmental Outcome Studies**

| Study                                  | Selection bias                                                                   | Exposure bias                                           | Outcome bias                                                                                                                                                      | Confounding                                                                                                          | Analytic bias                                                                           | Attrition bias                                                      | Overall risk of bias |
|----------------------------------------|----------------------------------------------------------------------------------|---------------------------------------------------------|-------------------------------------------------------------------------------------------------------------------------------------------------------------------|----------------------------------------------------------------------------------------------------------------------|-----------------------------------------------------------------------------------------|---------------------------------------------------------------------|----------------------|
| Warshafsky et al, <sup>31</sup> 2016   | Low: Sample from select group of population, based on residence                  | Minimal: Direct measurement of exposure from chart      | Low: Indirect assessment (mailed questionnaire)                                                                                                                   | Low: Certain confounders assessed - MgSO4 usage, smoking, SES, sex, parity, breastfeeding, gestational age, IUGR     | Moderate: Sample size estimation unclear                                                | High: >20% attrition                                                | Moderate             |
| Johnson et al, <sup>39</sup> 2015      | Low: Sample from four maternity centres, a midwife led unit and homebirths       | Minimal: Exposure from maternity records                | Low: Direct question to mother about outcome using Parent Report of Children's Abilities-Revised                                                                  | Low: Certain confounders assessed - ethnic group, SES, sex, ethnic group, SES, sex, received breastmilk at discharge | Low: Sample size calculation not performed, but all available eligible patients studied | High: >20% attrition                                                | Moderate             |
| Morsing and Maršál, <sup>40</sup> 2014 | Low: A select group of population - (pre-term infants, Lund University Hospital) | Minimal: Exposure from clinical data                    | Minimal: Standardised test - Wechsler Scales IQ Test                                                                                                              | Low: Matched for gestational age, gender and age at examination only                                                 | Moderate: Sample size estimation unclear                                                | Minimal: Little to no attrition                                     | Low                  |
| Heikura et al, <sup>32</sup> 2013      | Low: All maternal healthcare centres in Oulu and Lapland, Northern Finland       | Minimal: Structured questionnaire near time of exposure | Minimal: Psychometric tests collected from hospitals, institutions for children with intellectual disability, family counselling centres and school psychologists | Low: Certain confounders assessed - child's gender, family SES, maternal age, pre-pregnancy BMI, parity, birthweight | Low: Sample size calculation not performed, but all available eligible patients studied | Low: <10% attrition and reasons for loss of follow up not explained | Low                  |
| Tuovinen et al, <sup>33</sup> 2013     | Low: Sample from select group of population,                                     | Minimal: Exposure from hospital records                 | Low: Self-reported Cognitive Failures                                                                                                                             | Low: Certain confounders assessed - sex, length of gestation, weight, head circumference at birth,                   | Moderate: Sample size estimation unclear                                                | Moderate: >20% attrition but reasons for                            | Moderate             |

|                                    |                                                                                      |                                                                                       |                                                                          |                                                                                                                                                                                                     |                                                                                         |                                                                                                                                                            |          |
|------------------------------------|--------------------------------------------------------------------------------------|---------------------------------------------------------------------------------------|--------------------------------------------------------------------------|-----------------------------------------------------------------------------------------------------------------------------------------------------------------------------------------------------|-----------------------------------------------------------------------------------------|------------------------------------------------------------------------------------------------------------------------------------------------------------|----------|
|                                    | based on residence (Maternity Hospital, Helsinki, Finland)                           |                                                                                       | Questionnaire and Dysexecutive Questionnaire                             | father's occupation in childhood, parity, mother's age, BMI at delivery, age at completion of questionnaire                                                                                         |                                                                                         | loss of follow up explained                                                                                                                                |          |
| Leitner et al, <sup>41</sup> 2012  | Low: A select group - (IUGR) born at one medical centre                              | Minimal: Direct questioning about exposure and medical records                        | Minimal: Assessed by paediatric neurologists and psychologists           | Moderate: Not assessed for confounders                                                                                                                                                              | Low: Sample size calculation not performed, but all available eligible patients studied | Low: All subjects from initiation of study to final outcome assessment were accounted for. (Not definite however as N only given for those with full data) | Low      |
| Love et al, <sup>34</sup> 2012     | Low: A select group of population - Aberdeen Grampian                                | Low: Assessment of exposure from a dataset (Aberdeen Maternity and Neonatal Databank) | Low: Assessment from administrative database (Support Needs System)      | Low: Certain confounders assessed -maternal SES, induced labour, placental abruption, gestational age, birthweight                                                                                  | Minimal: Sample size calculation performed and adequate sample studied                  | Minimal: Little to no attrition                                                                                                                            | Low      |
| Tuovinen et al, <sup>49</sup> 2012 | Low: A select group of population - Maternity Hospital, Helsinki, Finland (Men only) | Minimal: Exposure from hospital records                                               | Low: Administrative database - Finnish Defence Forces Basic Ability Test | Low: Certain confounders assessed - gestational age, weigh, head circumference at birth, year of birth, childhood SES, parity, mother's age and BMI at delivery, age and height at military service | Moderate: Sample size estimation unclear                                                | Moderate: Only had data on 1196 out of 2786                                                                                                                | Moderate |
| Tuovinen et al, <sup>50</sup> 2012 | Low: A select group of                                                               | Minimal: Exposure from                                                                | Low: Administrative                                                      | Low: Certain confounders assessed - length of                                                                                                                                                       | Moderate: Sample size                                                                   | Moderate: Only had                                                                                                                                         | Moderate |



|                                      |                                                                                                                                                                                                 |                                                                              |                                                                                                               |                                                                                                                                                                                                                                                                                                                                                                                                           |                                                                                                                                                      |                                  |          |
|--------------------------------------|-------------------------------------------------------------------------------------------------------------------------------------------------------------------------------------------------|------------------------------------------------------------------------------|---------------------------------------------------------------------------------------------------------------|-----------------------------------------------------------------------------------------------------------------------------------------------------------------------------------------------------------------------------------------------------------------------------------------------------------------------------------------------------------------------------------------------------------|------------------------------------------------------------------------------------------------------------------------------------------------------|----------------------------------|----------|
|                                      | population - Maternity Hospital, Helsinki, Finland (Men only)                                                                                                                                   | hospital records                                                             | database - Finnish Defence Forces Basic Ability Test                                                          | gestation, weight and head circumference at birth, father's occupational status in childhood, parity, mother's age and BMI at delivery, age at testing, cognitive ability at 20 years, time interval between tests from 20-68 years, height at testing in late adulthood and blood pressure medication                                                                                                    | estimation unclear                                                                                                                                   | data on 398 out of 931           |          |
| Whitehouse et al, <sup>35</sup> 2012 | Low: A select group of population based on residence - Public antenatal clinic or surrounding private clinics in Perth, Western Australia. Sample may be over representative of lower SES group | Minimal: Exposure from the chart and confirmed by obstetricians and midwives | Minimal: Standardised tests - verbal ability and non-verbal reasoning ability                                 | Low: Certain confounders assessed - maternal age at conception, maternal education at pregnancy, household income during pregnancy, maternal smoking and alcohol, maternal essential hypertension, maternal use of anti-hypertensive medication, spontaneous labour, parity, gestational age, birthweight, APGAR score, offspring sex, scores on McMaster Family Assessment device at 3 or 5 years of age | Moderate: Sample size estimation unclear or only sub-sample of eligible patients studied (Unclear what percentage of eligible participants included) | High: >20% attrition but reasons | Moderate |
| Griffith et al, <sup>58</sup> 2011   | Low: A select group of population based on residence and SES - South Carolina Medicaid data                                                                                                     | Low: Assessment of exposure from a dataset - Medicaid billing files          | Low: Assessment from administrative database - Dept. of Education and Dept. of Disabilities and Special Needs | Low: Certain confounders assessed - maternal age, white race, education, birth year, female sex, preterm status                                                                                                                                                                                                                                                                                           | Low: Sample size calculation not performed, but all available eligible patients studied                                                              | Minimal: Little to no attrition  | Low      |
| Leversen et al, <sup>42</sup>        | Low: All                                                                                                                                                                                        | Low:                                                                         | Minimal:                                                                                                      | Low - Certain confounders                                                                                                                                                                                                                                                                                                                                                                                 | Low: Sample                                                                                                                                          | Low: 11-20%                      | Low      |

|                                      |                                                                                                                          |                                                                                                 |                                                                                              |                                                                                                                                                                                                                                                                                                                                                                                               |                                                                                                                                    |                                                   |     |
|--------------------------------------|--------------------------------------------------------------------------------------------------------------------------|-------------------------------------------------------------------------------------------------|----------------------------------------------------------------------------------------------|-----------------------------------------------------------------------------------------------------------------------------------------------------------------------------------------------------------------------------------------------------------------------------------------------------------------------------------------------------------------------------------------------|------------------------------------------------------------------------------------------------------------------------------------|---------------------------------------------------|-----|
| 2011                                 | extremely preterm births in Norway                                                                                       | Assessment of exposure from a dataset - Medical Birth Registry of Norway and registration forms | Assessment by paediatrician at age 5                                                         | assessed - gestational age, gender, illness severity score, small for gestational age, chorioamnionitis, prenatal steroids, multiple births, caesarean section, use of postnatal steroids, persistent ductus arteriosus, necrotizing enterocolitis, oxygen requirement at 36 weeks gestational age, retinopathy of prematurity, pathology on cerebral ultrasound, and high maternal education | size calculation not performed, but all available eligible patients studied                                                        | attrition                                         |     |
| Schlapbach et al, <sup>43</sup> 2010 | Low: A select group of population - Zurich, preterm infants                                                              | Low: Assessment of exposure from a dataset - University Hospital Zurich neonatal database       | Minimal: Performed routinely by paediatricians at age 2 years                                | Low: Certain confounders assessed - gestational age, birthweight, postnatal growth, mechanical ventilation, bronchopulmonary dysplasia                                                                                                                                                                                                                                                        | Low: Sample size calculation not performed, but all available eligible patients studied (small sample however: n=33 in each group) | Minimal: Little to no attrition                   | Low |
| Ehrenstein et al, <sup>36</sup> 2009 | Low: A select group of population - Danish men who presented for mandatory army fitness evaluation in the Fifth District | Low: Assessment of exposure from a dataset - Danish National Registry of Patients               | Minimal: Direct assessment using Boerge Prien Group Intelligence Test, converted to IQ scale | Low: Certain confounders assessed - small for gestational age, maternal age, parity, marital status, history of diabetes, conscript's year of birth, county of birth, birthweight, large for gestational age                                                                                                                                                                                  | Low: Sample size calculation not performed, but all available eligible patients studied                                            | Minimal: Little to no attrition                   | Low |
| Robinson et al, <sup>56</sup> 2009   | Low: A select group of population - Public antenatal clinic or                                                           | Minimal: Exposure from the chart by obstetricians and midwives in                               | Low: Parent Reported Child Behaviour Checklist                                               | Low: Certain confounders assessed - gestational age, birthweight, maternal smoking in pregnancy, child sex, maternal                                                                                                                                                                                                                                                                          | Low: Sample size calculation not performed, but all available eligible patients                                                    | High: >20% attrition - teenage and young mothers, | Low |

|                                    |                                                                                                   |                                                                                |                                                                                |                                                                                                                                                                                                                    |                                                                                                       |                                                                                                                                                                            |          |
|------------------------------------|---------------------------------------------------------------------------------------------------|--------------------------------------------------------------------------------|--------------------------------------------------------------------------------|--------------------------------------------------------------------------------------------------------------------------------------------------------------------------------------------------------------------|-------------------------------------------------------------------------------------------------------|----------------------------------------------------------------------------------------------------------------------------------------------------------------------------|----------|
|                                    | surrounding private clinics in Perth, Western Australia.                                          | research team                                                                  |                                                                                | experience of stressful events during pregnancy, maternal age at conception, maternal education in pregnancy, family income in pregnancy, presence of biological father during pregnancy, family functioning score | studied                                                                                               | those who did not live with child's father at birth, those who experienced high stress, those whose children had lower gestational age were less likely to remain in study |          |
| Spinillo et al, <sup>44</sup> 2009 | Low: A select group of population - preterm infants, single centre, Pavia, Italy                  | Minimal: Exposure from hospital records                                        | Minimal: Bayley Scales of Infant Development by child neuropsychiatrist        | Low: Certain confounders assessed - gestational age, proportion of expected birthweight, sex, umbilical artery, antenatal steroids                                                                                 | Low: Sample size calculation not performed, but all available eligible patients may have been studied | Minimal: <10% attrition                                                                                                                                                    | Low      |
| Wu et al, <sup>57</sup> 2009       | Minimal: Consecutive unselected population - all singleton born in Demar between 1978-2004        | Low: Assessment of exposure from a dataset - Danish National Hospital Register | Low: Assessment of exposure from a dataset - Danish National Hospital Register | Low: Certain confounders assessed - infant sex, gestational age, parity, maternal age, maternal education, marriage status at birth, calendar year                                                                 | Low: Sample size calculation not performed, but all available eligible patients studied               | Minimal: All subjects from initiation of study to final outcome assessment were accounted for                                                                              | Low      |
| Silveira et al, <sup>45</sup> 2007 | Low: A select group of population - very low birthweight infants in Hospital de Clinicas de Porto | Minimal: Exposure from the chart                                               | Minimal: Bayley Scales of Infant Development                                   | Moderate: Not assessed for confounders                                                                                                                                                                             | Low: Sample size calculation not performed, but all available eligible patients studied               | Moderate: >20% attrition but reasons for loss of follow up explained                                                                                                       | Moderate |

|                                      |                                                                                                                |                                                                                               |                                                                                                                                                                                  |                                                                                                                                                                                                                            |                                                                                                                         |                                                                                                                       |          |
|--------------------------------------|----------------------------------------------------------------------------------------------------------------|-----------------------------------------------------------------------------------------------|----------------------------------------------------------------------------------------------------------------------------------------------------------------------------------|----------------------------------------------------------------------------------------------------------------------------------------------------------------------------------------------------------------------------|-------------------------------------------------------------------------------------------------------------------------|-----------------------------------------------------------------------------------------------------------------------|----------|
|                                      | Alegre, Brazil                                                                                                 |                                                                                               |                                                                                                                                                                                  |                                                                                                                                                                                                                            |                                                                                                                         |                                                                                                                       |          |
| Leonard et al, <sup>59</sup><br>2006 | Minimal:<br>Consecutive<br>unselected<br>population -<br>Western<br>Australia                                  | Low:<br>Assessment of<br>exposure from a<br>dataset - birth<br>registry                       | Low:<br>Assessment of<br>exposure from a<br>dataset -<br>Disability<br>Services<br>Commission and<br>education<br>sources                                                        | Low: Aggregate SES<br>measures                                                                                                                                                                                             | Low: Sample<br>size calculation<br>not performed,<br>but all available<br>eligible patients<br>studied                  | Minimal: All<br>subjects from<br>initiation of<br>study to final<br>outcome<br>assessment<br>were<br>accounted<br>for | Low      |
| Many 2005                            | Low: A select<br>group of<br>population -<br>severe growth<br>restriction                                      | Minimal: Direct<br>questioning<br>(interview)                                                 | Minimal:<br>Wechsler<br>Preschool and<br>Primary Scale of<br>Intelligence                                                                                                        | Moderate: Not assessed<br>for confounders                                                                                                                                                                                  | Moderate:<br>Sample size<br>estimation<br>unclear                                                                       | Moderate:<br>11-20%<br>attrition but<br>reasons for<br>loss of follow<br>up not<br>explained                          | Moderate |
| Lawlor et al, <sup>51</sup><br>2005  | Low: A select<br>group of<br>population -<br>primary school<br>attenders in<br>Aberdeen,<br>Scotland           | Low:<br>Assessment of<br>exposure from a<br>dataset -<br>Maternal and<br>Neonatal<br>Database | Low:<br>Assessment<br>from<br>administrative<br>database -<br>Aberdeen<br>Childhood<br>Development<br>Survey linked to<br>routine<br>intelligence tests<br>in primary<br>schools | Moderate: Not assessed<br>for confounders (not for<br>HDP estimates, but<br>associations between all<br>complications of pregnancy<br>and IQ attenuated towards<br>the null when adjusted for<br>parental characteristics) | Low: Sample<br>size calculation<br>not performed,<br>but all available<br>eligible patients<br>studied                  | Minimal:<br>Little to no<br>attrition                                                                                 | Low      |
| Cheng et al, <sup>46</sup><br>2004   | Low: A select<br>group of<br>population - very<br>low birthweight,<br>delivery before<br>32 weeks<br>gestation | Minimal:<br>Exposure from<br>the chart                                                        | Minimal:<br>Evaluated by<br>psychiatrist -<br>Bayley Scales of<br>Infant<br>Development                                                                                          | Low: Certain confounders<br>assessed - parental<br>education (unclear if there<br>are others)                                                                                                                              | Low: Sample<br>size calculation<br>not performed,<br>but all available<br>eligible patients<br>may have been<br>studied | Minimal:<br>Little to no<br>attrition                                                                                 | Low      |
| Many et al, <sup>47</sup>            | Low: A select                                                                                                  | Minimal:                                                                                      | Minimal:                                                                                                                                                                         | Low: Certain confounders                                                                                                                                                                                                   | Low: Sample                                                                                                             | Low: 11-20%                                                                                                           | Low      |

|                                    |                                                                                                          |                                                                        |                                                                             |                                                                         |                                                                                                       |                                                                      |          |
|------------------------------------|----------------------------------------------------------------------------------------------------------|------------------------------------------------------------------------|-----------------------------------------------------------------------------|-------------------------------------------------------------------------|-------------------------------------------------------------------------------------------------------|----------------------------------------------------------------------|----------|
| 2003                               | group of population - Lis Maternity Hospital, Israel (children born growth restricted)                   | Exposure from the chart                                                | Standardised IQ test                                                        | assessed - gestational age, birthweight, neonatal complications         | size calculation not performed, but all available eligible patients may have been studied             | attrition                                                            |          |
| McCowan et al, <sup>52</sup> 2002  | Low: A select group of population - small for gestational age infants at Auckland Hospital, New Zealand  | Minimal: Direct questioning (interview) by midwife                     | Minimal: Assessed by trained psychologist                                   | Moderate: Not assessed for confounders                                  | Low: Sample size calculation not performed, but all available eligible patients may have been studied | Moderate: >20% attrition but reasons for loss of follow up explained | Moderate |
| Gray et al, <sup>53</sup> 1998     | Low: A select group of population - very preterm infants, Mater Mother's Hospital, Brisbane, Australia   | Minimal: Exposure from the chart                                       | Minimal: Griffiths' Infant Ability Scale                                    | Moderate: Not assessed for confounders                                  | Minimal: Sample size calculation performed and adequate sample studied                                | Minimal: <10% attrition                                              | Low      |
| Spinillo et al, <sup>54</sup> 1994 | Low: A select group of population - one clinical setting in Italy                                        | Low: Assessment of exposure from a dataset                             | Low: Assessment from administrative database                                | Low: Certain confounders assessed - social class and maternal education | Low: Sample size calculation not performed, but all available eligible patients may have been studied | Minimal: <10% attrition                                              | Low      |
| Seidman et al, <sup>37</sup> 1991  | Low: A select group of population - 17 year olds during assessment for drafting to Israel Defence Forces | Low: Assessment of exposure from a dataset - Jerusalem Perinatal Study | Low: Assessment from administrative database - Israel Defence Force records | Moderate: Not assessed for confounders                                  | Low: Sample size calculation not performed, but all available eligible patients may have been studied | Minimal: Little to no attrition                                      | Low      |

|                                        |                                                                                            |                                                  |                                                                                                                                              |                                                                                                                                                                            |                                                                                                       |                                                                      |          |
|----------------------------------------|--------------------------------------------------------------------------------------------|--------------------------------------------------|----------------------------------------------------------------------------------------------------------------------------------------------|----------------------------------------------------------------------------------------------------------------------------------------------------------------------------|-------------------------------------------------------------------------------------------------------|----------------------------------------------------------------------|----------|
| Szymonowicz et al, <sup>48</sup> 1987  | Low: A select group of population - very low birthweight infants at one centre             | Low: Assessment of exposure from a dataset       | Minimal: Bayley Scales                                                                                                                       | Moderate: Not assessed for confounders                                                                                                                                     | Moderate: Sample size estimation unclear                                                              | Minimal: Little to no attrition                                      | Moderate |
| Salonen et al, <sup>60</sup> 1984      | Low: A select group of population - All 9-10 year olds in one Finnish county in 1979-81    | Minimal: Confirmed by physician during pregnancy | Low: Assessment from administrative database - records in local Developmental Defect Registries or screening in schools                      | Low: Certain confounders assessed- mother's age at birth, sibling with mental retardation or birth defect, parity, mode of birth, mother's smoking status during pregnancy | Low: Sample size calculation not performed, but all available eligible patients studied               | Low: <10% attrition and reasons for loss of follow up not explained  | Low      |
| Winer et al, <sup>55</sup> 1982        | Moderate: Sample selection process unclear                                                 | Minimal: Exposure from the chart                 | Minimal: Psychological testing (carried out blinded)                                                                                         | Moderate: Not assessed for confounders                                                                                                                                     | Low: Sample size calculation not performed, but all available eligible patients may have been studied | Moderate: >20% attrition but reasons for loss of follow up explained | Moderate |
| Barker and Edwards, <sup>38</sup> 1967 | Low: A select group of population - children in Birmingham who took the 'Eleven Plus' exam | Minimal: Exposure from the chart                 | Moderate: Eleven Plus exam (However, those in special schools or those in mainstream school but assessed as "borderline subnormal" excluded) | Moderate: Not assessed for confounders (but matched by sibpairs)                                                                                                           | Low: Sample size calculation not performed, but all available eligible patients studied               | Minimal: <10% attrition                                              | Moderate |



# Additional forest plots displaying results of studies that provide both a crude and adjusted estimates for the association between HDP-ASD and HDP-ADHD

**eFigure 1. ASD Studies With Crude and Adjusted Estimates**

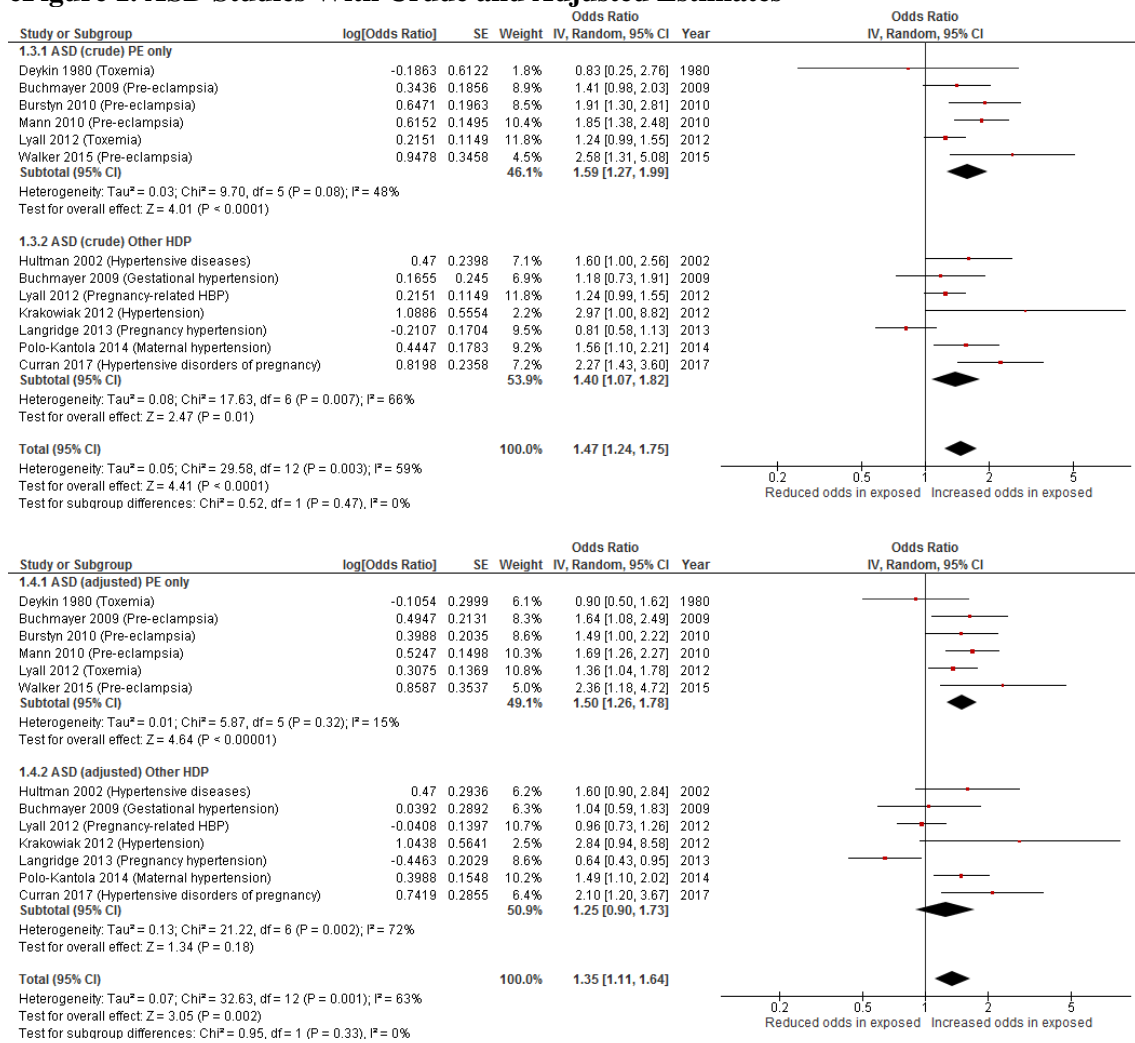

Forest plots displaying crude and adjusted estimates examining the association between HDP and ASD in the offspring.



**eFigure 2. ADHD Studies With Crude and Adjusted Estimates**

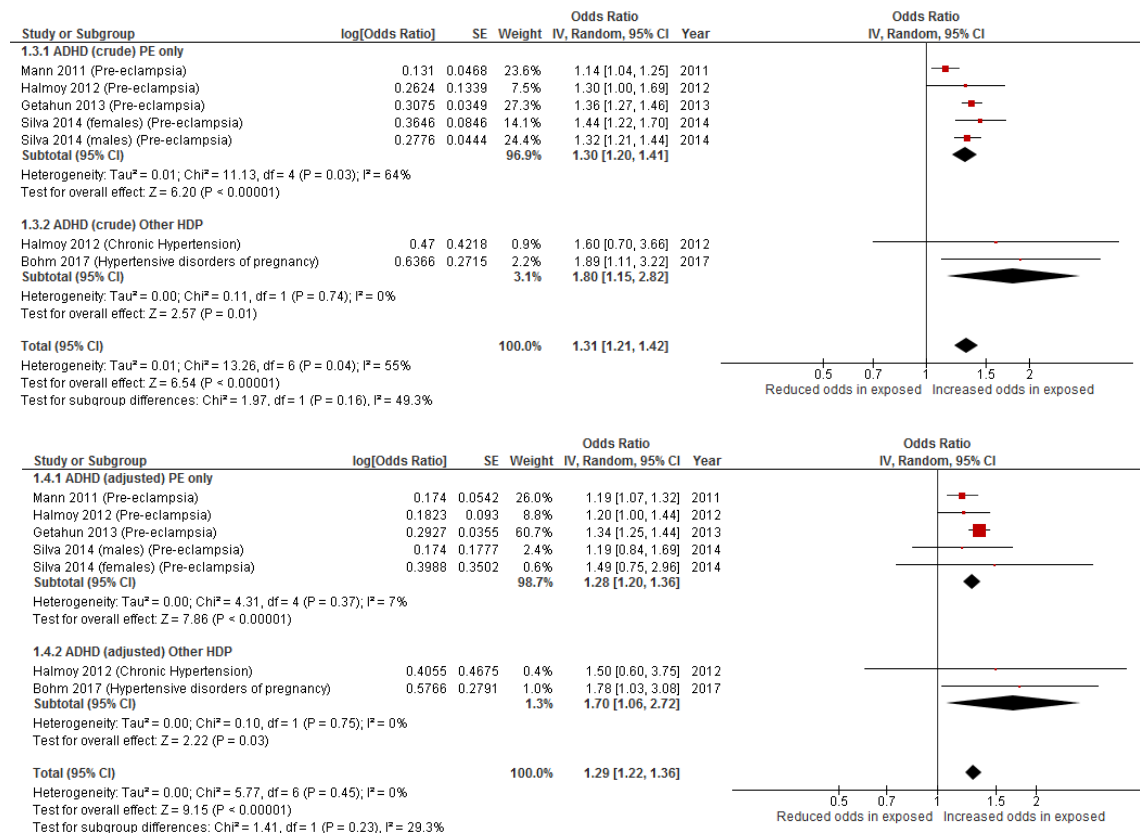

Forest plots displaying crude and adjusted estimates examining the association between HDP and ADHD in the offspring.

**Figure 3. ASD Studies That Adjust for Maternal Age and Smoking and Parity/Birth Order**

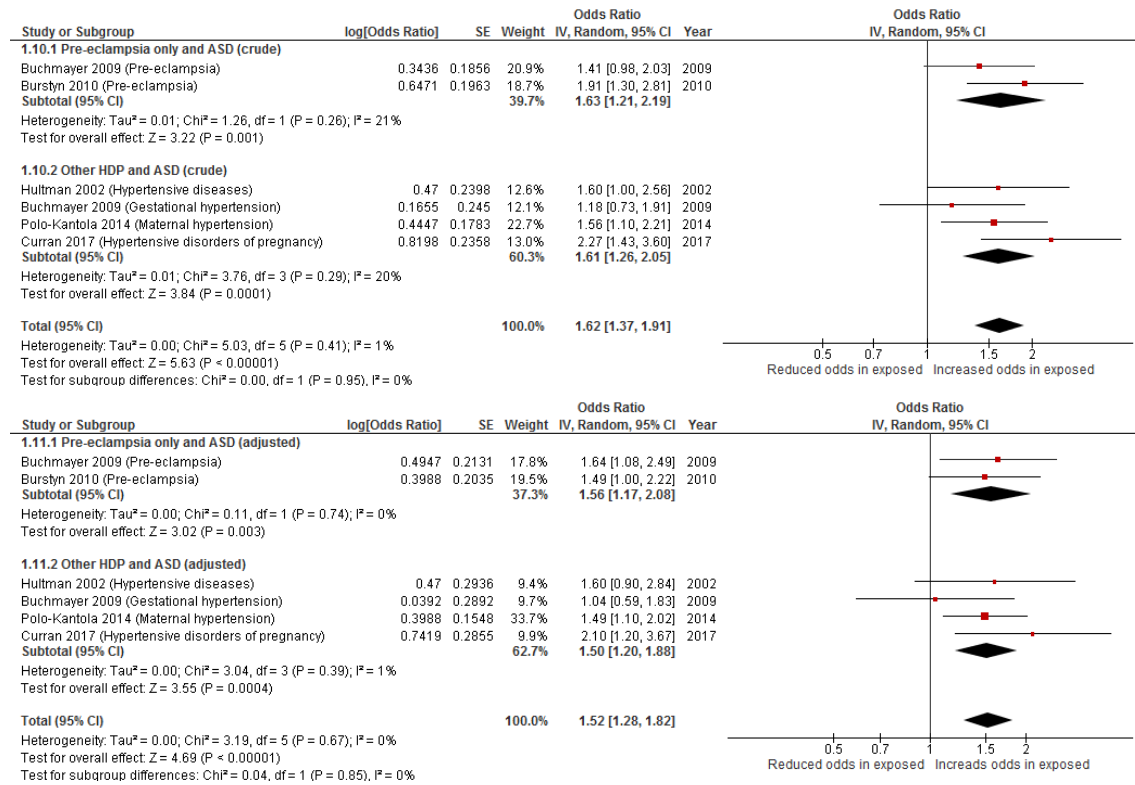

Forest plots displaying crude and adjusted estimates examining the association between HDP and ASD in the offspring.

**eFigure 4. ADHD Studies That Adjust for Maternal Age and Educational Level**

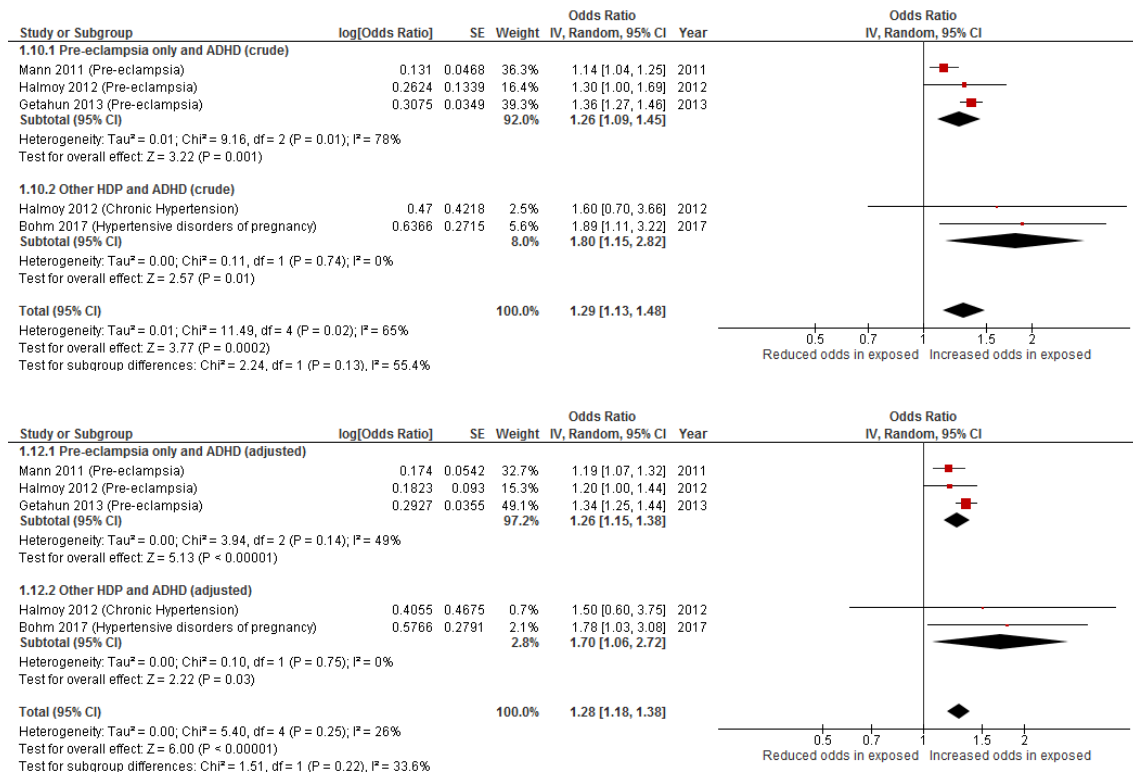

Forest plots displaying crude and adjusted estimates examining the association between HDP and ADHD in the offspring.

**eFigure 5. Funnel Plot of Published HDP and ASD Studies**

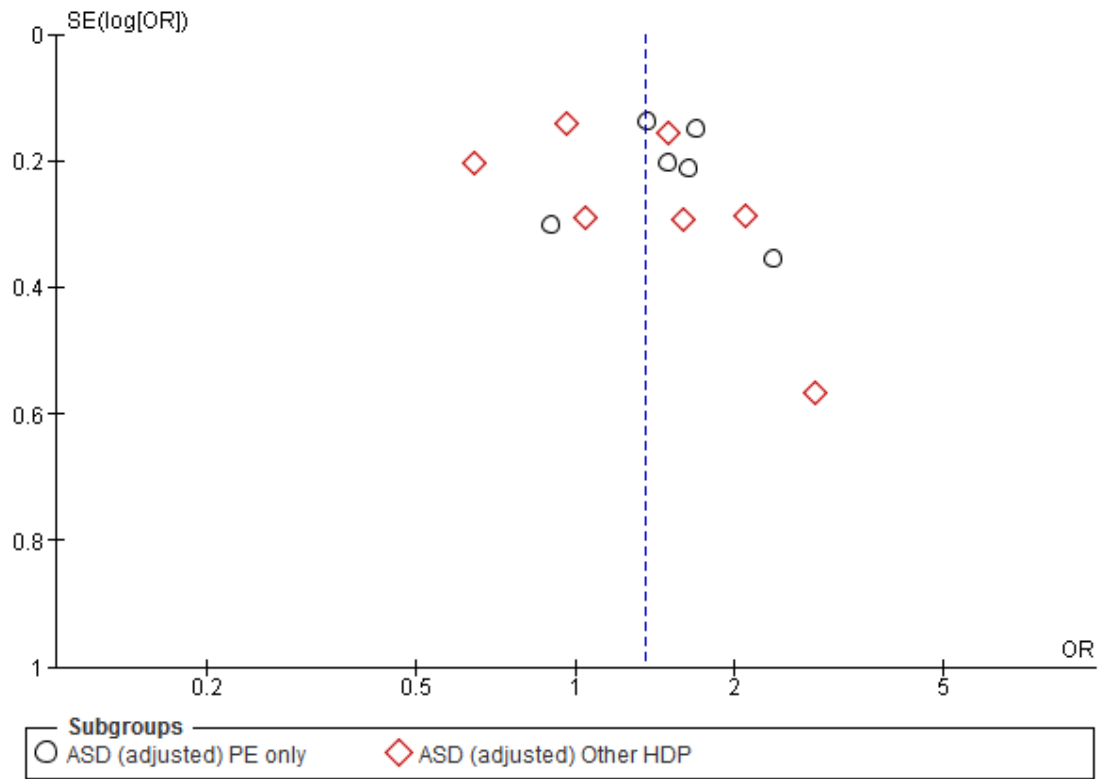

## References

1. Curran EA, O'Neill SM, Cryan JF, et al. Research review: birth by caesarean section and development of autism spectrum disorder and attention-deficit/hyperactivity disorder: a systematic review and meta-analysis. *J Child Psychol Psychiatry*. 2015;56(5):500-508.
2. Walker CK, Krakowiak P, Baker A, Hansen RL, Ozonoff S, Hertz-Picciotto I. Preeclampsia, placental insufficiency, and autism spectrum disorder or developmental delay. *JAMA Pediatr*. 2015;169(2):154-162.
3. Polo-Kantola P, Lampi KM, Hinkka-Yli-Salomäki S, Gissler M, Brown AS, Sourander A. Obstetric risk factors and autism spectrum disorders in Finland. *J Pediatr*. 2014;164(2):358-365.
4. Langridge AT, Glasson EJ, Nassar N, et al. Maternal conditions and perinatal characteristics associated with autism spectrum disorder and intellectual disability. *PLoS One*. 2013;8(1):e50963.
5. Mrozek-Budzyn D, Majewska R, Kieltyka A. Prenatal, perinatal and neonatal risk factors for autism: study in Poland. *Cent Eur J Med*. 2013;8(4):424-430.
6. Nath S, Roy R, Mukherjee S. Perinatal complications associated with autism: a case control study in a neurodevelopment and early intervention clinic. *J Indian Med Assoc*. 2012;110(8):526-529.
7. Lyall K, Pauls DL, Spiegelman D, Ascherio A, Santangelo SL. Pregnancy complications and obstetric suboptimality in association with autism spectrum disorders in children of the Nurses' Health Study II. *Autism Res*. 2012;5(1):21-30.
8. Krakowiak P, Walker CK, Bremer AA, et al. Maternal metabolic conditions and risk for autism and other neurodevelopmental disorders. *Pediatrics*. 2012;129(5):e1121-e1128.
9. Dodds L, Fell DB, Shea S, Armson BA, Allen AC, Bryson S. The role of prenatal, obstetric and neonatal factors in the development of autism. *J Autism Dev Disord*. 2011;41(7):891-902.
10. Burstyn I, Sithole F, Zwaigenbaum L. Autism spectrum disorders, maternal characteristics and obstetric complications among singletons born in Alberta, Canada. *Chronic Dis Can*. 2010;30(4):125-134.
11. Mann JR, McDermott S, Bao H, Hardin J, Gregg A. Pre-eclampsia, birth weight, and autism spectrum disorders. *J Autism Dev Disord*. 2010;40(5):548-554.
12. Bilder D, Pinborough-Zimmerman J, Miller J, McMahon W. Prenatal, perinatal, and neonatal factors associated with autism spectrum disorders. *Pediatrics*. 2009;123(5):1293-1300.
13. Buchmayer S, Johansson S, Johansson A, Hultman CM, Sparén P, Cnattingius S. Can association between preterm birth and autism be explained by maternal or neonatal morbidity? *Pediatrics*. 2009;124(5):e817-e825.

14. Larsson HJ, Eaton WW, Madsen KM, et al. Risk factors for autism: perinatal factors, parental psychiatric history, and socioeconomic status. *Am J Epidemiol*. 2005;161(10):916-925.
15. Glasson EJ, Bower C, Petterson B, de Klerk N, Chaney G, Hallmayer JF. Perinatal factors and the development of autism: a population study. *Arch Gen Psychiatry*. 2004;61(6):618-627.
16. Hultman CM, Sparén P, Cnattingius S. Perinatal risk factors for infantile autism. *Epidemiology*. 2002;13(4):417-423.
17. Eaton WW, Mortensen PB, Thomsen PH, Frydenberg M. Obstetric complications and risk for severe psychopathology in childhood. *J Autism Dev Disord*. 2001;31(3):279-285.
18. Matsuishi T, Yamashita Y, Ohtani Y, et al. Brief report: incidence of and risk factors for autistic disorder in neonatal intensive care unit survivors. *J Autism Dev Disord*. 1999;29(2):161-166.
19. Mason-Brothers A, Ritvo ER, Pingree C, et al. The UCLA–University of Utah epidemiologic survey of autism: prenatal, perinatal, and postnatal factors. *Pediatrics*. 1990;86(4):514-519.
20. Deykin EY, MacMahon B. Pregnancy, delivery, and neonatal complications among autistic children. *AJDC*. 1980;134(9):860-864.
21. Böhm S, Curran EA, Kenny LC, O’Keeffe GW, Murray D, Khashan AS. The effect of hypertensive disorders of pregnancy on the risk of ADHD in the offspring [published online January 1, 2017]. *J Atten Disord*. doi:10.1177/1087054717690230
22. Silva D, Colvin L, Hagemann E, Bower C. Environmental risk factors by gender associated with attention-deficit/hyperactivity disorder. *Pediatrics*. 2014;133(1):e14-e22.
23. Çak HT, Gokler B. Attention deficit hyperactivity disorder and associated perinatal risk factors in preterm children. *Turk Pediatri Ars*. 2013;48(4):315-322.
24. Getahun D, Rhoads GG, Demissie K, et al. In utero exposure to ischemic-hypoxic conditions and attention-deficit/hyperactivity disorder. *Pediatrics*. 2013;131(1):e53-e61.
25. Golmirzaei J, Namazi S, Amiri S, et al. Evaluation of attention-deficit hyperactivity disorder risk factors. *Int J Pediatr*. 2013;2013:953103.
26. Amiri S, Malek A, Sadegfard M, Abdi S. Pregnancy-related maternal risk factors of attention-deficit hyperactivity disorder: a case-control study. *ISRN Pediatr*. 2012;2012:458064.
27. Halmøy A, Klungsøyr K, Skjærven R, Haavik J. Pre- and perinatal risk factors in adults with attention-deficit/hyperactivity disorder. *Biol Psychiatry*. 2012;71(5):474-481.

28. Ketzer CR, Gallois C, Martinez AL, Rohde LA, Schmitz M. Is there an association between perinatal complications and attention-deficit/hyperactivity disorder-inattentive type in children and adolescents? *Rev Bras Psiquiatr.* 2012;34(3):321-328.
29. Gustafsson P, Källén K. Perinatal, maternal, and fetal characteristics of children diagnosed with attention-deficit–hyperactivity disorder: results from a population-based study utilizing the Swedish Medical Birth Register. *Dev Med Child Neurol.* 2011;53(3):263-268.
30. Mann JR, McDermott S. Are maternal genitourinary infection and pre-eclampsia associated with ADHD in school-aged children? *J Atten Disord.* 2011;15(8):667-673.
31. Warshafsky C, Pudwell J, Walker M, Wen SW, Smith G. A prospective assessment of neurodevelopment in children following a pregnancy complicated by severe preeclampsia. *Paediatr Child Health.* 2015;20(5):e40-e41.
32. Heikura U, Hartikainen AL, Nordstrom T, Pouta A, Taanila A, Jarvelin MR. Maternal hypertensive disorders during pregnancy and mild cognitive limitations in the offspring. *Paediatric Perinat Epidemiol.* 2013;27(2):188-198.
33. Tuovinen S, Eriksson JG, Kajantie E, et al. Maternal hypertensive disorders in pregnancy and self-reported cognitive impairment of the offspring 70 years later: the Helsinki Birth Cohort Study. *Am J Obstet Gynecol.* 2013;208(3):200.e1-200.e9.
34. Love ER, Crum J, Bhattacharya S. Independent effects of pregnancy induced hypertension on childhood development: a retrospective cohort study. *Eur J Obstet Gynecol Reprod Biol.* 2012;165(2):219-224.
35. Whitehouse AJ, Robinson M, Newnham JP, Pennell CE. Do hypertensive diseases of pregnancy disrupt neurocognitive development in offspring? *Paediatr Perinat Epidemiol.* 2012;26(2):101-108.
36. Ehrenstein V, Rothman KJ, Pedersen L, Hatch EE, Sørensen HT. Pregnancy-associated hypertensive disorders and adult cognitive function among Danish conscripts. *Am J Epidemiol.* 2009;170(8):1025-1031.
37. Seidman DS, Laor A, Gale R, Stevenson DK, Mashlach S, Danon YL. Pre-eclampsia and offspring's blood pressure, cognitive ability and physical development at 17-years-of-age. *Br J Obstet Gynaecol.* 1991;98(10):1009-1014.
38. Barker DJ, Edwards JH. Obstetric complications and school performance. *BMJ.* 1967;3(5567):695-699.
39. Johnson S, Evans TA, Draper ES, et al. Neurodevelopmental outcomes following late and moderate prematurity: a population-based cohort study. *Arch Dis Child Fetal Neonatal Ed.* 2015;100(4):F301-F308.
40. Morsing E, Maršál K. Pre-eclampsia: an additional risk factor for cognitive impairment at school age after intrauterine growth restriction and very preterm birth. *Early Hum Dev.* 2014;90(2):99-101.

41. Leitner Y, Harel S, Geva R, Eshel R, Yaffo A, Many A. The neurocognitive outcome of IUGR children born to mothers with and without preeclampsia. *J Matern Fetal Neonatal Med.* 2012;25(11):2206-2208.
42. Leversen KT, Sommerfelt K, Rønnestad A, et al. Prediction of neurodevelopmental and sensory outcome at 5 years in Norwegian children born extremely preterm. *Pediatrics.* 2011;127(3):e630-e638.
43. Schlapbach LJ, Ersch J, Adams M, Bernet V, Bucher HU, Latal B. Impact of chorioamnionitis and preeclampsia on neurodevelopmental outcome in preterm infants below 32 weeks gestational age. *Acta Paediatr.* 2010;99(10):1504-1509.
44. Spinillo A, Montanari L, Gardella B, Roccio M, Stronati M, Fazzi E. Infant sex, obstetric risk factors, and 2-year neurodevelopmental outcome among preterm infants. *Dev Med Child Neurol.* 2009;51(7):518-525.
45. Silveira RC, Procianoy RS, Koch MS, Benjamin ACW, Schlindwein CF. Growth and neurodevelopment outcome of very low birth weight infants delivered by preeclamptic mothers. *Acta Paediatr.* 2007;96(12):1738-1742.
46. Cheng S-W, Chou H-C, Tsou K-I, Fang L-J, Tsao P-N. Delivery before 32 weeks of gestation for maternal pre-eclampsia: neonatal outcome and 2-year developmental outcome. *Early Hum Dev.* 2004;76(1):39-46.
47. Many A, Fattal A, Leitner Y, Kupfermanc MJ, Harel S, Jaffa A. Neurodevelopmental and cognitive assessment of children born growth restricted to mothers with and without preeclampsia. *Hypertens Pregnancy.* 2003;22(1):25-29.
48. Szymonowicz W, Yu VY. Severe pre-eclampsia and infants of very low birth weight. *Arch Dis Child.* 1987;62(7):712-716.
49. Tuovinen S, Räikkönen K, Kajantie E, et al. Hypertensive disorders in pregnancy and intellectual abilities in the offspring in young adulthood: the Helsinki Birth Cohort Study. *Ann Med.* 2012;44(4):394-403.
50. Tuovinen S, Raikkonen K, Kajantie E, et al. Hypertensive disorders in pregnancy and cognitive decline in the offspring up to old age. *Neurology.* 2012;79(15):1578-1582.
51. Lawlor DA, Batty GD, Morton SM, et al. Early life predictors of childhood intelligence: evidence from the Aberdeen Children of the 1950s study. *J Epidemiol Community Health.* 2005;59(8):656-663.
52. McCowan LM, Pryor J, Harding JE. Perinatal predictors of neurodevelopmental outcome in small-for-gestational-age children at 18 months of age. *Am J Obstet Gynecol.* 2002;186(5):1069-1075.
53. Gray PH, O'Callaghan MJ, Mohay HA, Burns YR, King JF. Maternal hypertension and neurodevelopmental outcome in very preterm infants. *Arch Dis Child.* 1998;79(2):F88-F93.



54. Spinillo A, Iasci A, Capuzzo E, Egbe TO, Colonna L, Fazzi E. Two-year infant neurodevelopmental outcome after expectant management and indicated preterm delivery in hypertensive pregnancies. *Acta Obstet Gynecol Scand.* 1994;73(8):625-629.
55. Winer EK, Tejani NA, Atluru V, DiGiuseppe R, Borofsky LG. Four- to seven-year evaluation in two groups of small-for-gestational age infants. *Am J Obstet Gynecol.* 1982;143(4):425-429.
56. Robinson M, Mattes E, Oddy WH, et al. Hypertensive diseases of pregnancy and the development of behavioral problems in childhood and adolescence: the Western Australian Pregnancy Cohort Study. *J Pediatr.* 2009;154(2):218-224.e2.
57. Wu CS, Nohr EA, Bech BH, Vestergaard M, Catov JM, Olsen J. Health of children born to mothers who had preeclampsia: a population-based cohort study. *Am J Obstet Gynecol.* 2009;201(3):269.e1-269.e10.
58. Griffith MI, Mann JR, McDermott S. The risk of intellectual disability in children born to mothers with preeclampsia or eclampsia with partial mediation by low birth weight. *Hypertens Pregnancy.* 2011;30(1):108-115.
59. Leonard H, de Klerk N, Bourke J, Bower C. Maternal Health in Pregnancy and Intellectual Disability in the Offspring: A Population-Based Study. *Ann Epidemiol.* 2006;16(6):448-454.
60. Salonen JT, Heinonen OP. Mental retardation and mother's hypertension during pregnancy. *J Ment Defic Res.* 1984;28(pt 1):53-56.
